# Supplementary material
Source: PubMed Central journal article supplement (PMC6151477)
Supplement: MD-009-C8MD00370J-s001.pdf [file MD-009-C8MD00370J-s001.pdf]

## SUPPLEMENTARY INFORMATION

### LIPOPHILICITY PREDICTION OF PEPTIDES AND PEPTIDE DERIVATIVES BY CONSENSUS MACHINE LEARNING

Jens-Alexander Fuchs, Francesca Grisoni, Michael Kossenjans, Jan A. Hiss and Gisbert Schneider

|                                        |       |         |
|----------------------------------------|-------|---------|
| Figure S1, PCA Scree plot              | ..... | S2      |
| Figure S2, logD distributions          | ..... | S3      |
| Figure S3, PCA loadings                | ..... | S4      |
| Figure S4, SVR Williams plot           | ..... | S5      |
| Figure S5, Regression metrics          | ..... | S6      |
| Table S1, LASOO features               | ..... | S7      |
| Table S2, $\gamma$ -scrambling results | ..... | S8      |
| Peptide analytics, raw data            | ..... | S9-S20  |
| Table S3, experimental logD data       |       |         |
| LIPOPEP and In-House peptides          | ..... | S21-S31 |

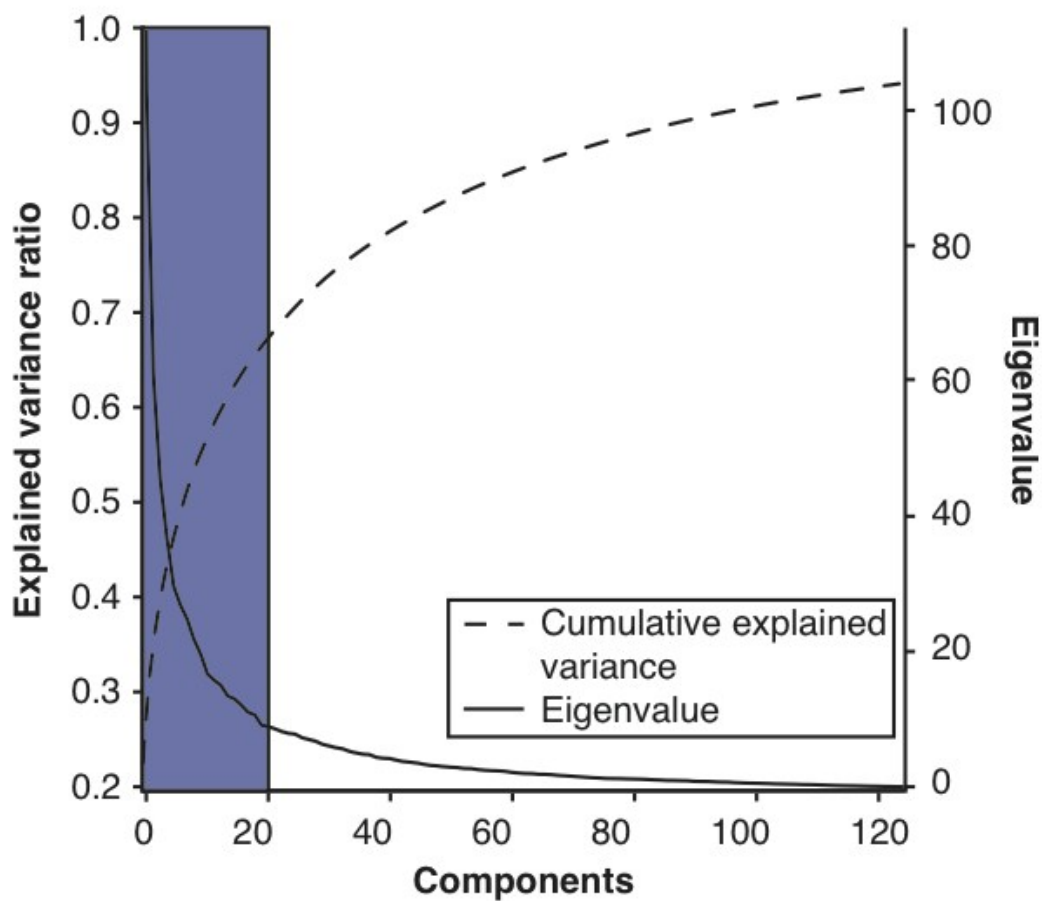

**Figure S1.** PCA Scree plot. Cumulative sum of explained variance (dashed line) and Eigenvalues of the respective principal components (straight line). 20 components were selected (blue area) and the calculated scores serve as a reduced feature set.

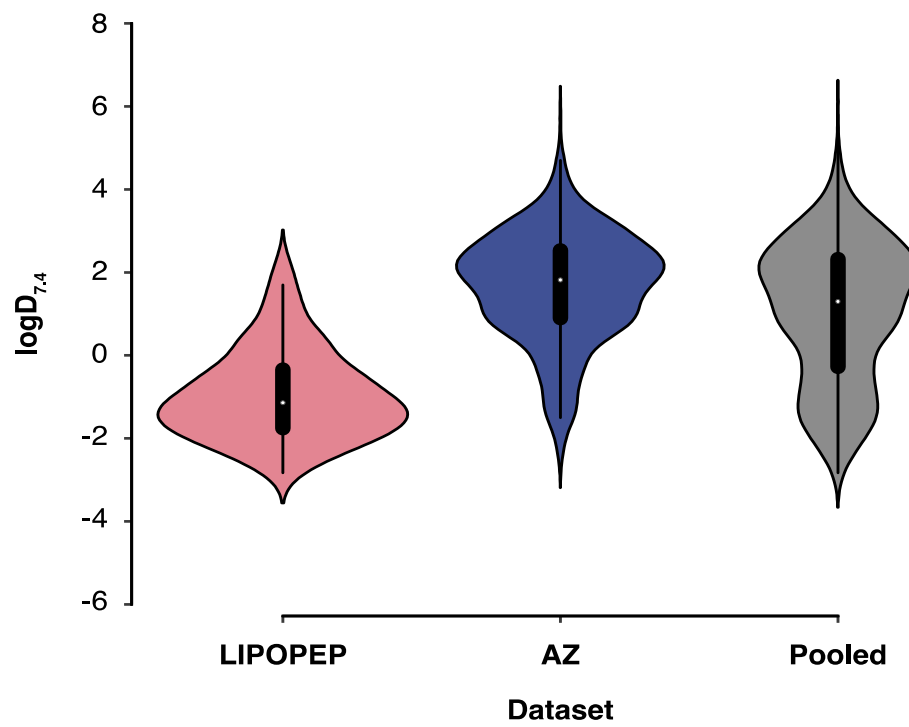

**Figure S2.** Violin plots showing  $\log D_{7.4}$  distributions of LIPOPEP, AZ and the pooled data set.

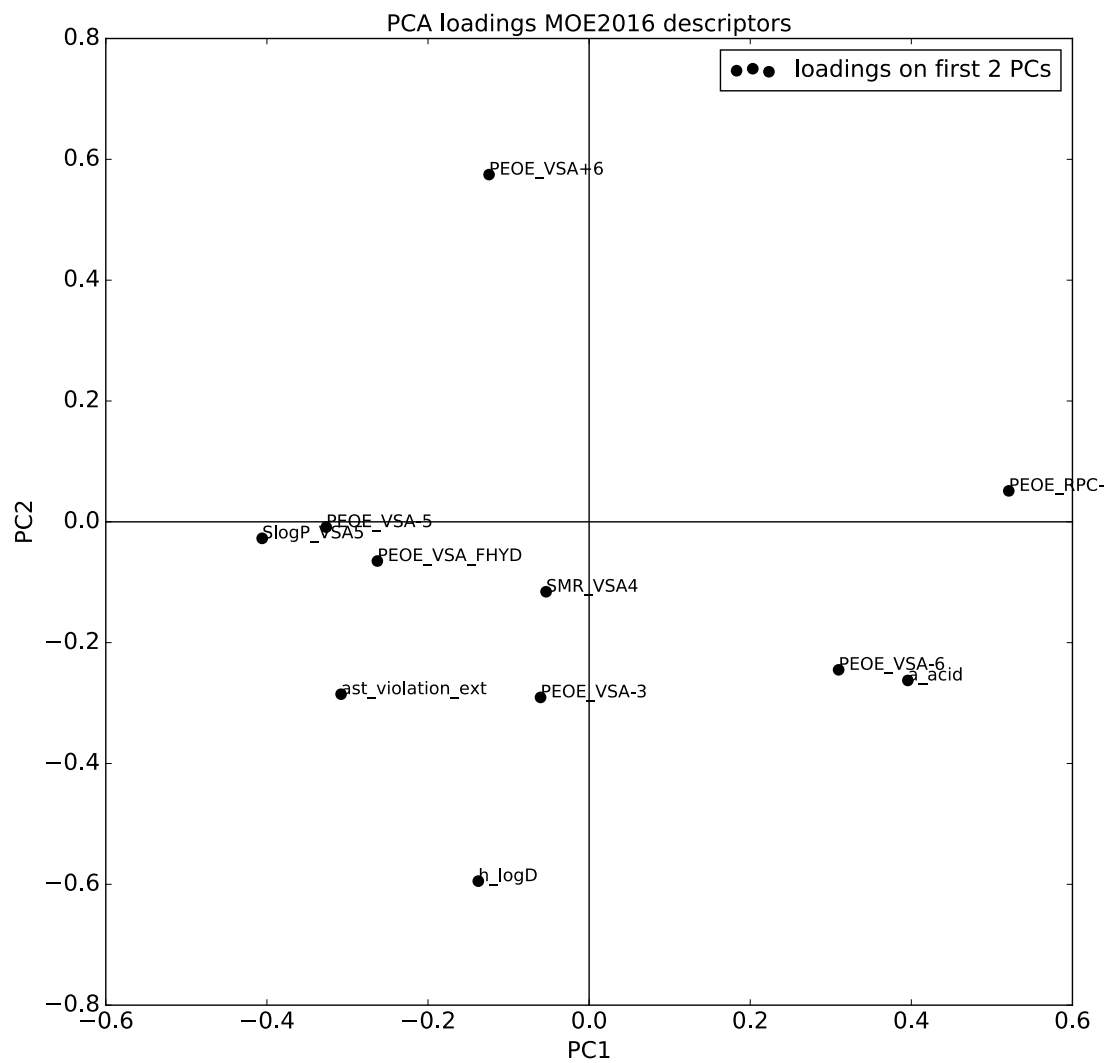

**Figure S3.** PCA Loadings of the LASSO selected features on the first two principal components.

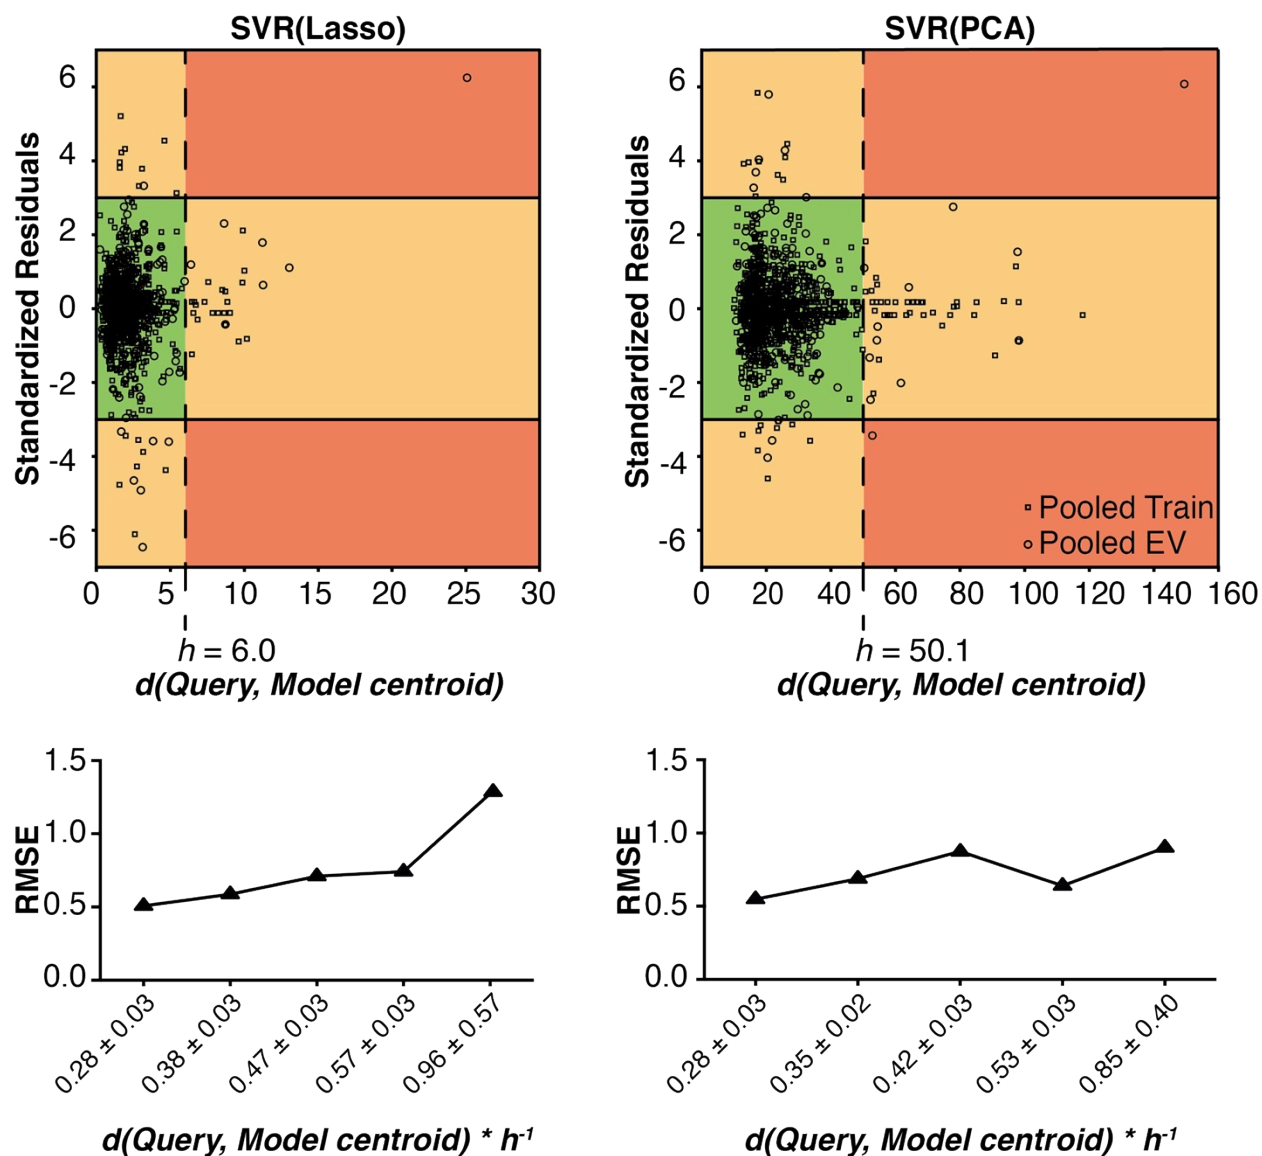

**Figure S4.** Top: Williams plots of standardized residuals vs. leverages for compound in pooled training Set (squares) and external validation (circles) for SVR(Lasso) and SVR(PCA). The vertical line depicts the warning leverage  $h$ . Horizontal lines indicate standardized residuals at -3 and 3. Observations in the green rectangle are within AD and cover 99.7% of normally distributed error (approximately 95% of the data for SVR(Lasso) and SVR(PCA)). Observations in light orange exceed one of the thresholds, observations in dark orange exceed both. Bottom: RMSE in relation to “Novelty” of a query. Novelty is quantified as the ratio of distance to model centroid divided by  $h$ . Objects in external validation partitions were sorted according to their novelty and binned into five equally sized groups. Lines connecting the markers are introduced for visualisation and do not display a function.

$$RMSE = \sqrt{\frac{\sum_{i=1}^n (\hat{y}_i - y_i)^2}{n}} \quad \%accurate = \frac{\sum (\hat{y}_i - y_i) < 0.5}{n}$$

$$R^2 = 1 - \frac{\sum_{i=1}^{n_{TR}} (y_i - \hat{y}_i)^2}{\sum_{i=1}^{n_{TR}} (y_i - \bar{y}_{TR})^2} \quad Q^2_{F1} = 1 - \frac{\sum_{i=1}^{n_{CV}} (y_i - \hat{y}_{i|i})^2}{\sum_{i=1}^{n_{CV}} (y_i - \bar{y}_{TR})^2}$$

**Figure S5.** Regression metrics used to evaluate the performance of the models.

**Table S1.** List of descriptors after feature selection with LASSO.

| Name              | Description                                                                                                                                                                                                                                                                                                                                                                                                      |
|-------------------|------------------------------------------------------------------------------------------------------------------------------------------------------------------------------------------------------------------------------------------------------------------------------------------------------------------------------------------------------------------------------------------------------------------|
| h_logD            | Octanol/water distribution coefficient at pH 7 calculated as a state average: $\log \sum \{10^{h_{\log P_i} - pC_i}\}$ . Here, $h_{\log P}$ is the pH-independent octanol/water partition coefficient using an eight parameter model based on Hueckel Theory [unpublished] with $R^2 = 0.84$ , RMSE=0.59 on 1,836 small molecules. Peptides or peptidic structures were not subject of the training set.         |
| PEOE_VSA-6        | Partial Equalization of Orbital Electronegativities (PEOE) (Gasteiger 1980) that calculates atomic partial charges only from elements, formal charges and connectivity information of the molecule. Here: sum of vdW surface of atom $i$ ( $v_i$ ) where the partial charge of atom $i$ ( $q_i$ ) is $< -0.30$ . Most negative partial charge category. $v_i$ is calculated by a connection table approximation. |
| SMR_VSA4          | Subdivided surface area: Sum of $v_i$ such that the atomic contribution to molar refractivity (model Crippen 1999) is in range [0.39, 0.44]. Representation of polarizability of a molecule.                                                                                                                                                                                                                     |
| SlogP_VSA5        | Subdivided surface area: Sum of $v_i$ such that the atomic contribution to logP (model Crippen 1999) is in range [0.15, 0.20]. Intermediate hydrophobic contribution.                                                                                                                                                                                                                                            |
| a_acid            | Number of acidic atoms                                                                                                                                                                                                                                                                                                                                                                                           |
| PEOE_RPC-         | Relative negative partial charge: the smallest negative $q_i$ divided by the sum of the negative $q_i$ .                                                                                                                                                                                                                                                                                                         |
| PEOE_VSA-5        | Sum of $v_i$ where $q_i$ is in range [-0.25, -0.3]. Second highest negative partial charge category.                                                                                                                                                                                                                                                                                                             |
| PEOE_VSA_FHYD     | Fractional hydrophobic vdW surface area, also calculated by $v_i$ and $q_i$                                                                                                                                                                                                                                                                                                                                      |
| PEOE_VSA+6        | Sum of $v_i$ where $q_i$ is $> 0.3$ . Most positive partial charge category.                                                                                                                                                                                                                                                                                                                                     |
| ast_violation_ext | Astex fragment like violation count (rule of three: $hbd < 3$ , $hba < 3$ , $clogP < 3$ )                                                                                                                                                                                                                                                                                                                        |
| PEOE_VSA-3        | Sum of $v_i$ where $q_i$ is in range [-0.15, -0.2]. Intermediate negative partial charge category.                                                                                                                                                                                                                                                                                                               |

**Table S2.** Model performance before and after y-randomization.

| Dataset | Model       | Original Training       |             |      | Original Cross Validation       |             |       |
|---------|-------------|-------------------------|-------------|------|---------------------------------|-------------|-------|
|         |             | RMSE*                   | % accurate* | R2   | RMSE*                           | % accurate* | Q2F1  |
| LIPOPEP | Lasso (MOE) | 0.52 ± 0.02             | 78.6 ± 1.6  | 0.79 | 0.60 ± 0.09                     | 75.5 ± 7.4  | 0.68  |
|         | SVR (MOE)   | 0.37 ± 0.02             | 91.2 ± 1.0  | 0.88 | 0.47 ± 0.13                     | 86.0 ± 3.1  | 0.80  |
|         | SVR (PCA)   | 0.4 ± 0.01              | 83.9 ± 1.1  | 0.87 | 0.59 ± 0.11                     | 73.8 ± 4.1  | 0.69  |
| Pooled  | SVR (MOE)   | 0.69 ± 0.01             | 68.8 ± 1.5  | 0.83 | 0.77 ± 0.05                     | 65.2 ± 3.1  | 0.79  |
|         | SVR (PCA)   | 0.59 ± 0.01             | 72.9 ± 1.5  | 0.78 | 0.78 ± 0.04                     | 58.9 ± 3.3  | 0.78  |
| Dataset | Model       | y - Randomized Training |             |      | y - Randomized Cross Validation |             |       |
|         |             | RMSE*                   | % accurate* | R2   | RMSE*                           | % accurate* | Q2F1  |
| LIPOPEP | Lasso (MOE) | 1.06 ± 0.03             | 36.3 ± 2.2  | 0.03 | 1.08 ± 0.11                     | 35.3 ± 7.0  | 0.85  |
|         | SVR (MOE)   | 1.03 ± 0.03             | 45.6 ± 2.2  | 0.10 | 1.13 ± 0.12                     | 35.9 ± 6.8  | 0.84  |
|         | SVR (PCA)   | 0.98 ± 0.03             | 50.9 ± 2.3  | 0.21 | 1.14 ± 0.12                     | 35.8 ± 6.4  | 0.84  |
| Pooled  | SVR (MOE)   | 1.65 ± 0.02             | 26.5 ± 1.0  | 0.06 | 1.75 ± 0.07                     | 21.1 ± 2.6  | 0.04  |
|         | SVR (PCA)   | 1.54 ± 0.02             | 34.1 ± 1.1  | 0.18 | 1.78 ± 0.07                     | 20.6 ± 2.6  | -0.01 |

\*Average values and standard deviation are given



## Analytics of in-house peptide JF\_1\_1

| Sequence               | Mw     | Exp. logD <sub>7.4</sub> | Basic functions |
|------------------------|--------|--------------------------|-----------------|
| ALIWGY-NH <sub>2</sub> | 720.86 | 0.92±0.02                | 1               |

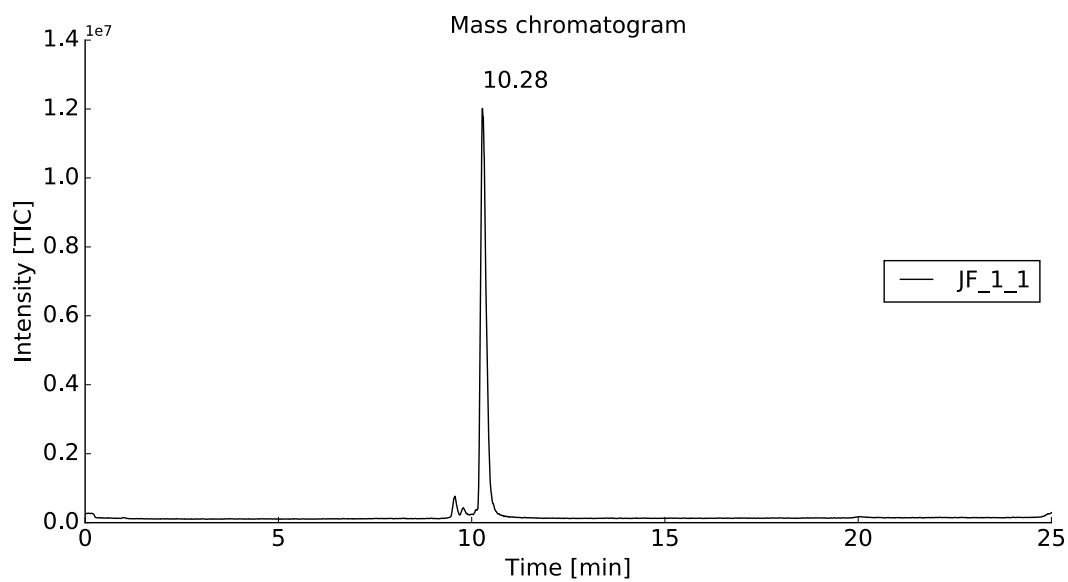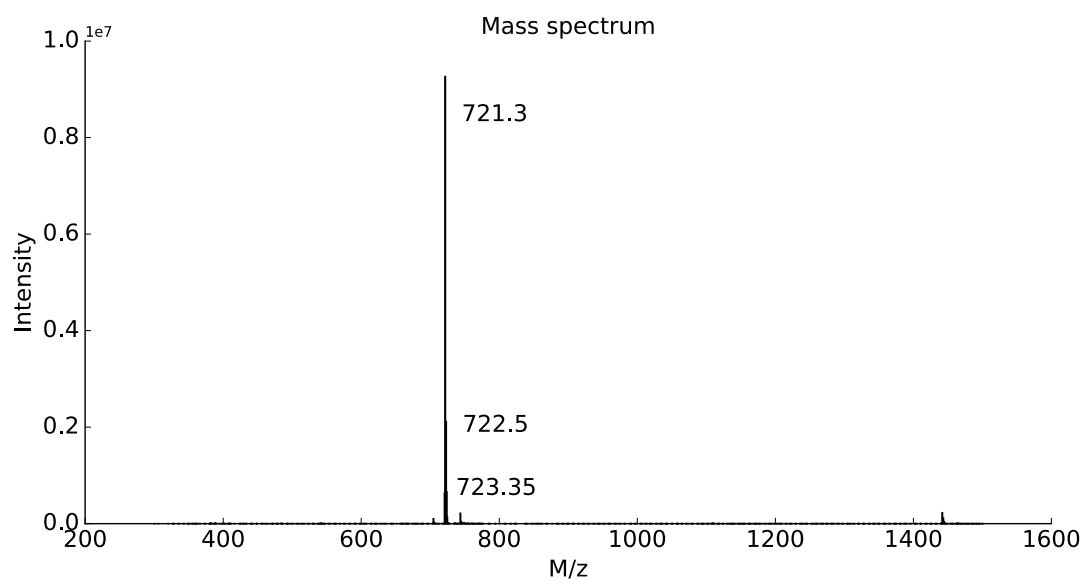

## Analytics of in-house peptide JF\_1\_2

| Sequence               | Mw     | Exp. logD <sub>7.4</sub> | Basic functions |
|------------------------|--------|--------------------------|-----------------|
| FLGKVV-NH <sub>2</sub> | 747.93 | -0.99±0.02               | 2               |

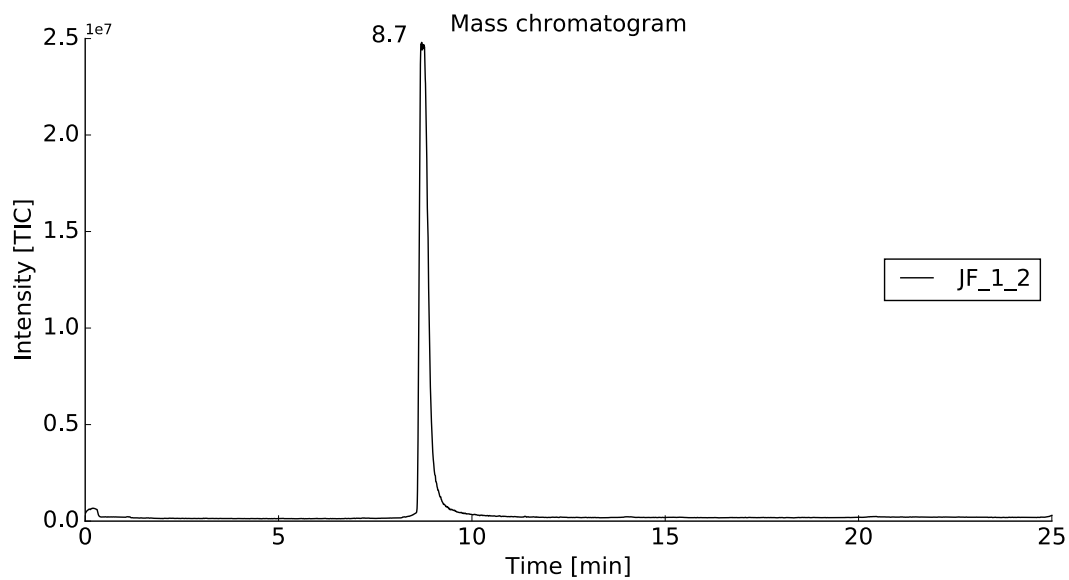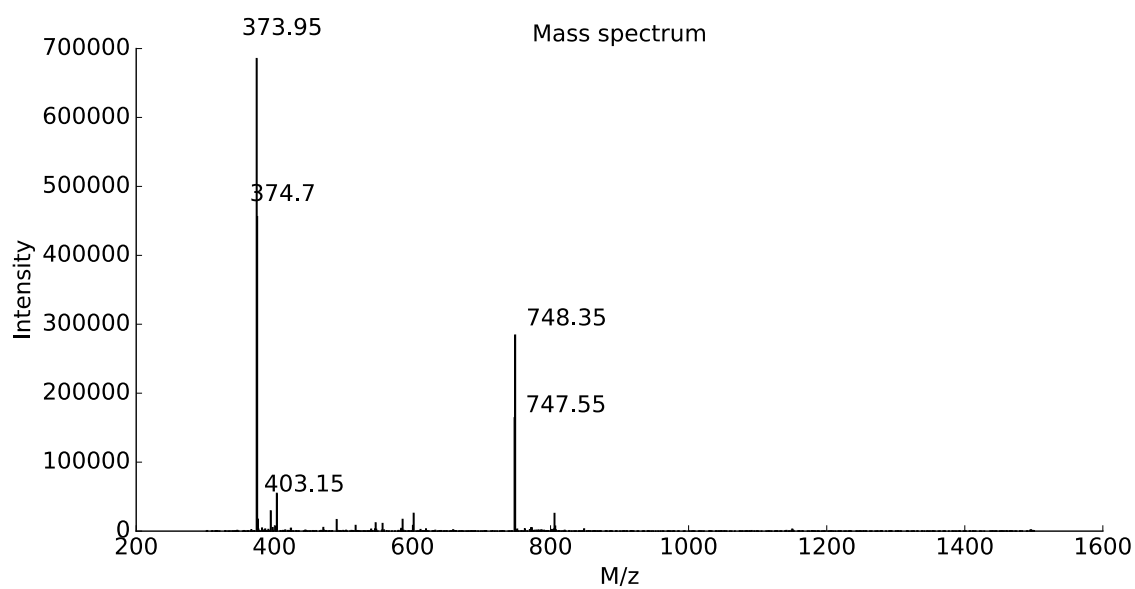

## Analytics of in-house peptide JF\_1\_3

| Sequence               | Mw     | Exp. logD <sub>7.4</sub> | Basic functions |
|------------------------|--------|--------------------------|-----------------|
| GAWPFL-NH <sub>2</sub> | 688.81 | 0.80±0.01                | 1               |

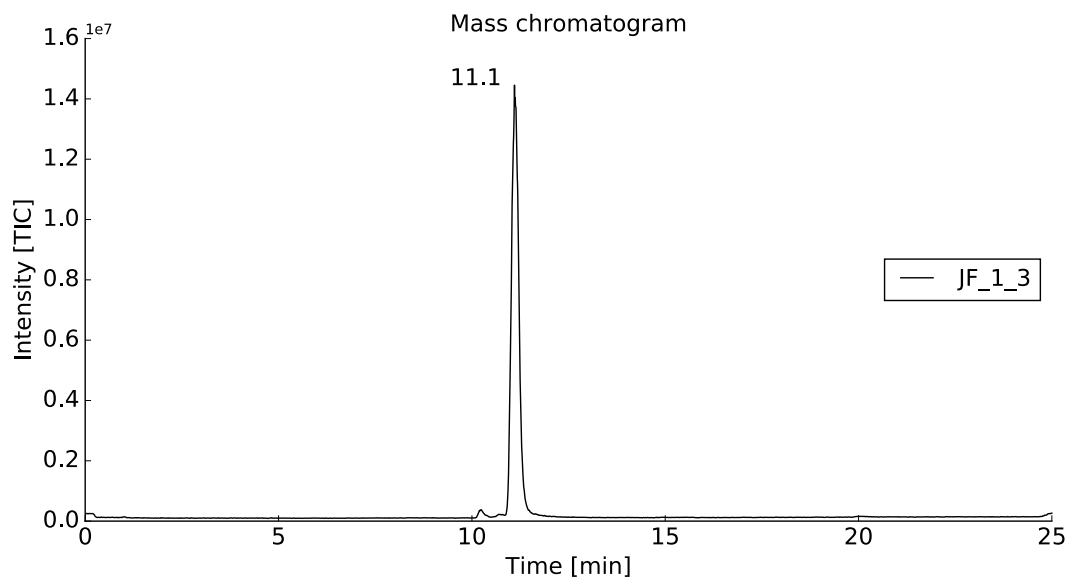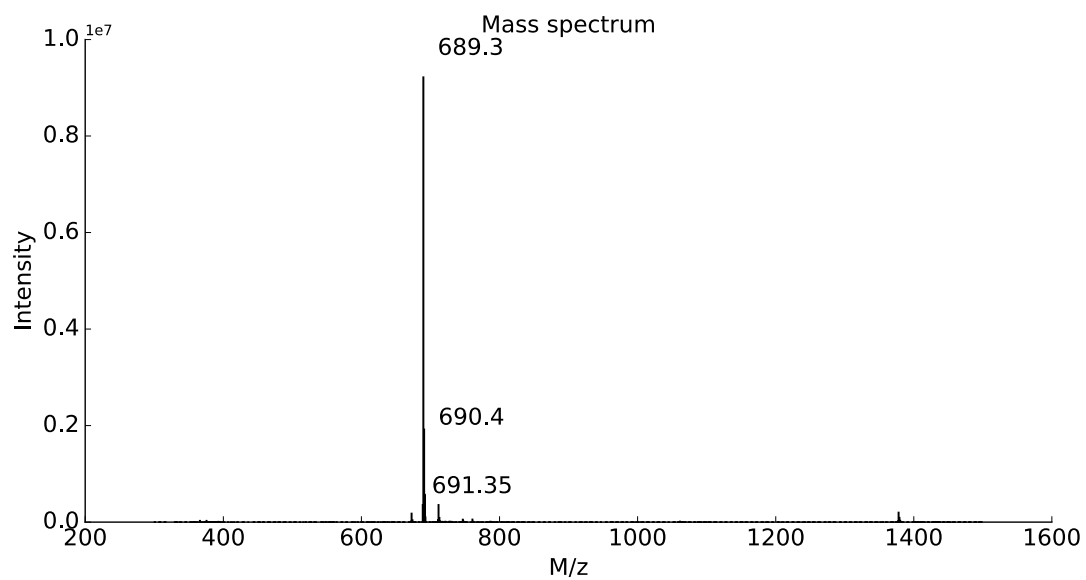

## Analytics of in-house peptide JF\_1\_4

| Sequence               | Mw     | Exp. logD <sub>7.4</sub> | Basic functions |
|------------------------|--------|--------------------------|-----------------|
| IPFWKL-NH <sub>2</sub> | 802.02 | -0.85±0.03               | 2               |

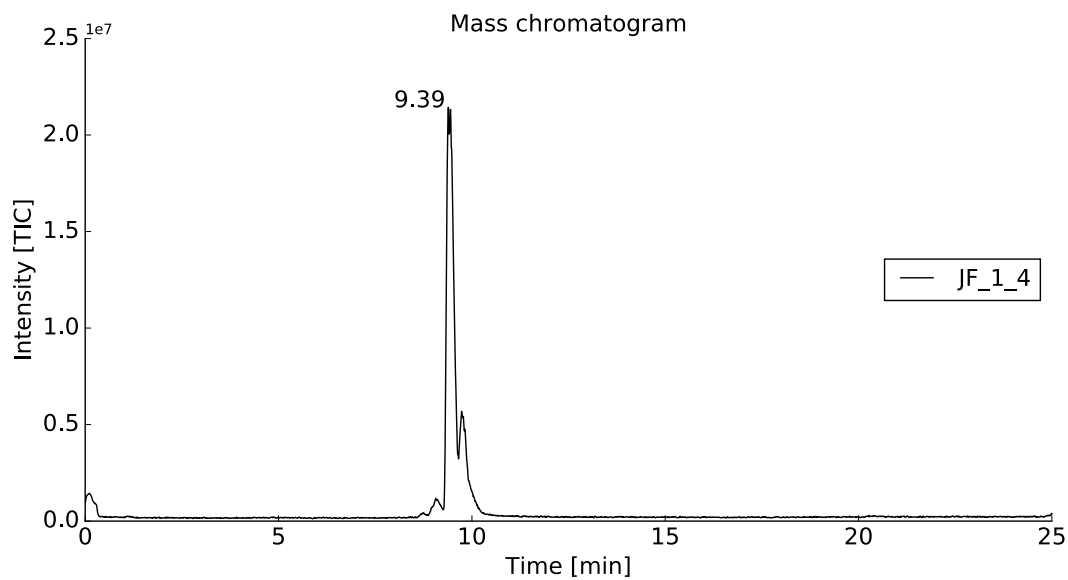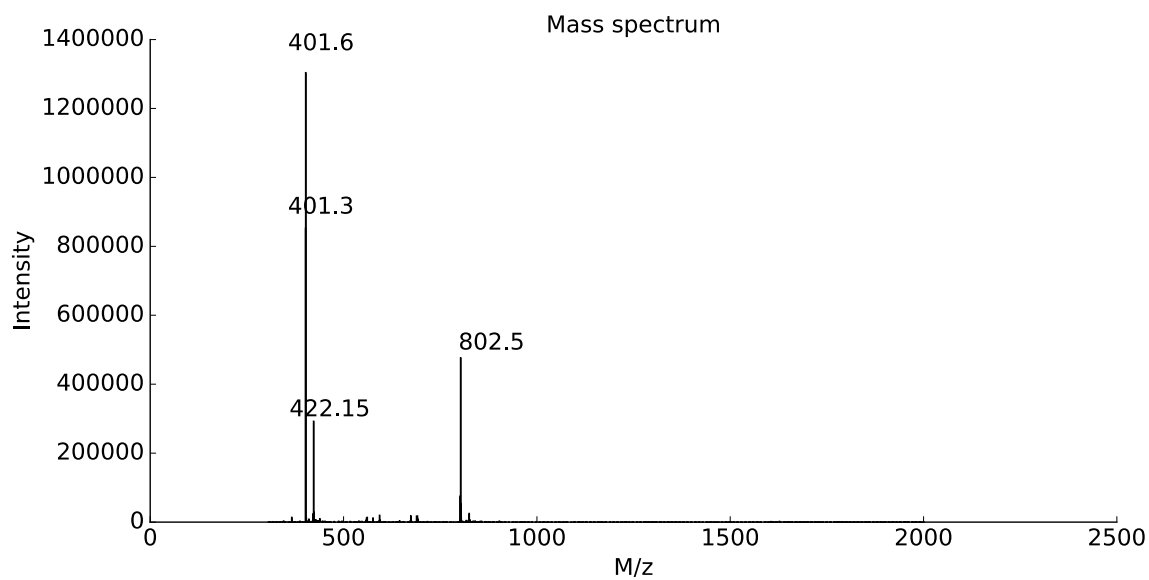

## Analytics of in-house peptide JF\_1\_5

| Sequence               | Mw     | Exp. logD <sub>7.4</sub> | Basic functions |
|------------------------|--------|--------------------------|-----------------|
| KLVWAF-NH <sub>2</sub> | 761,95 | -1.13±0.02               | 2               |

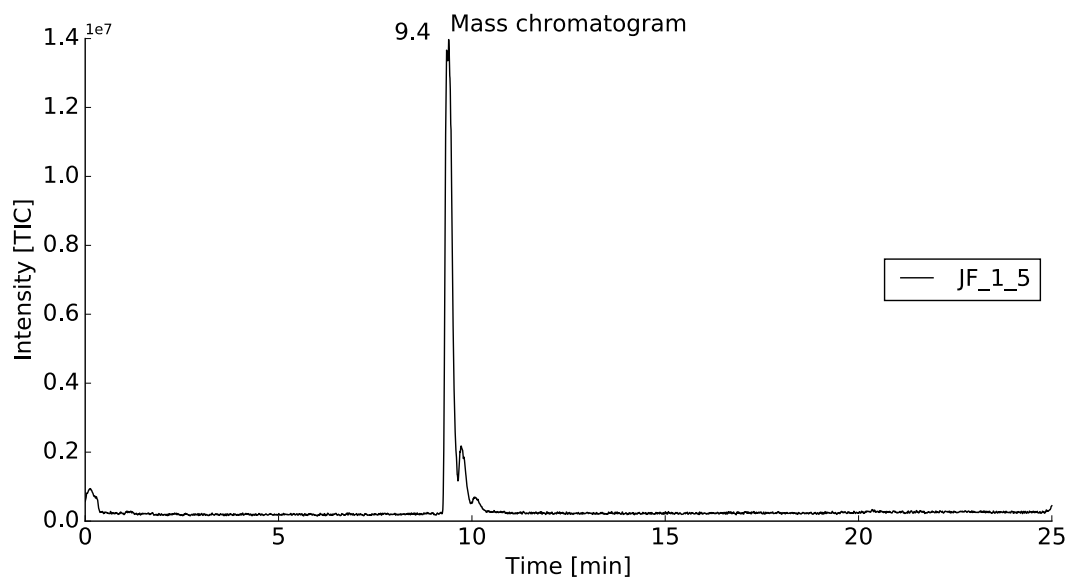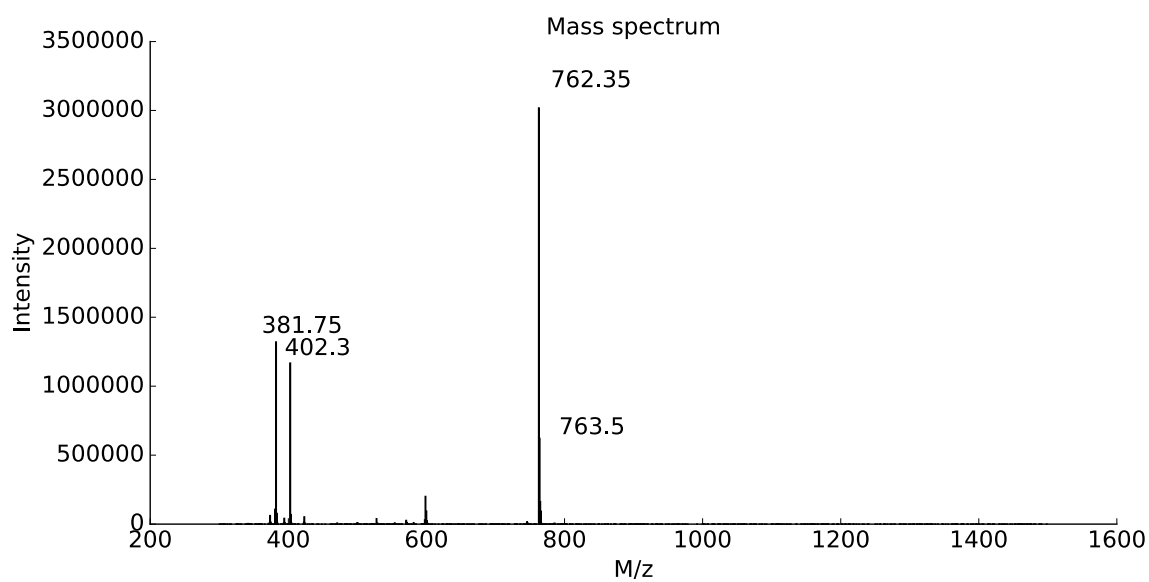

## Analytics of in-house peptide JF\_1\_6

| Sequence               | Mw     | Exp. logD <sub>7.4</sub> | Basic functions |
|------------------------|--------|--------------------------|-----------------|
| LPVGWF-NH <sub>2</sub> | 716.87 | 1.12±0.02                | 1               |

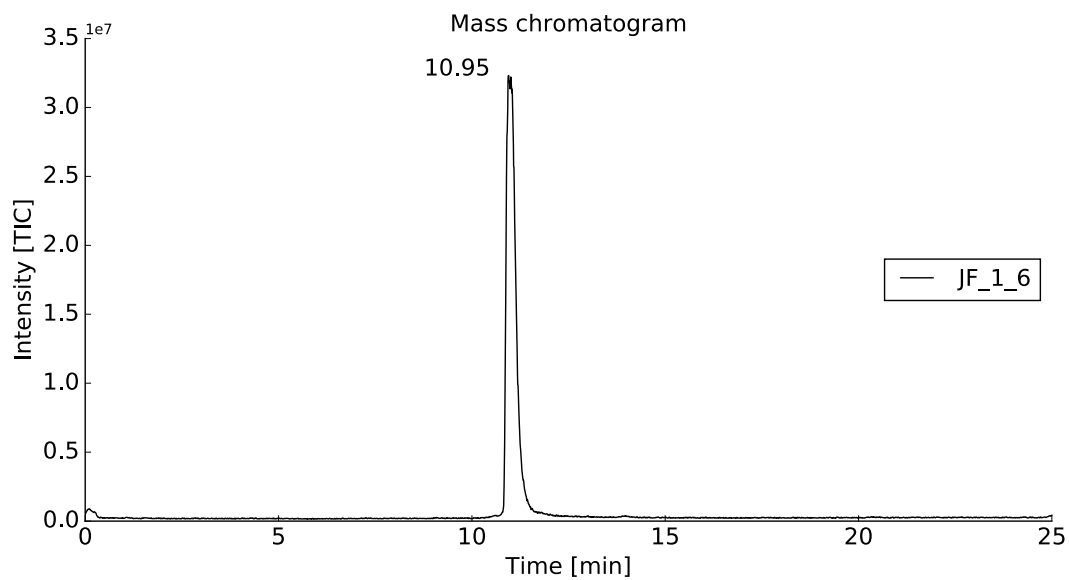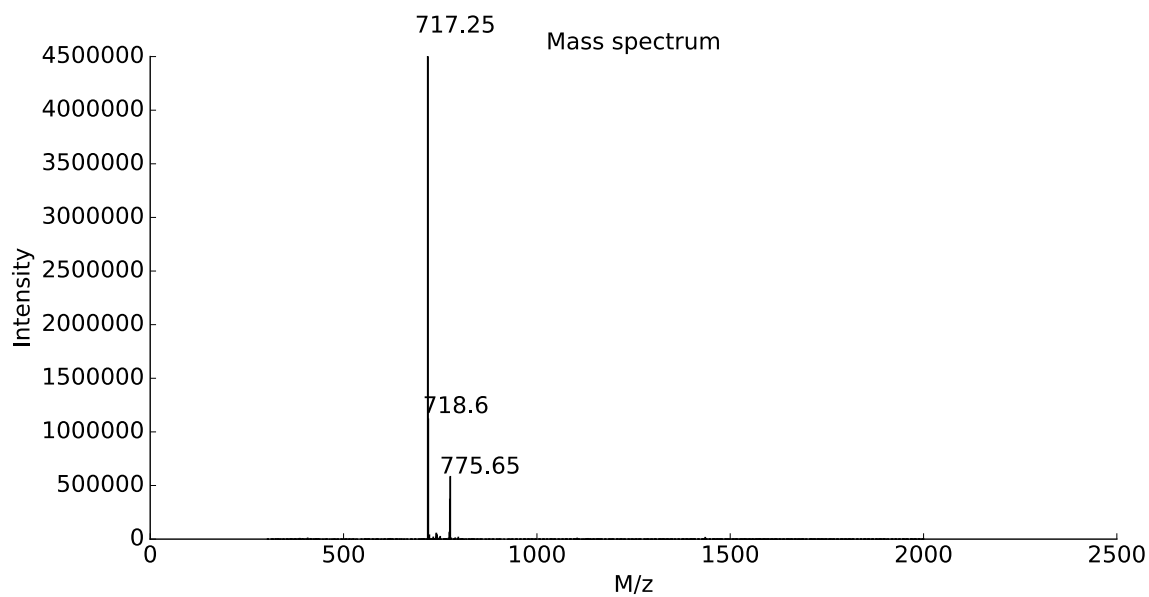

## Analytics of in-house peptide JF\_1\_7

| Sequence               | Mw     | Exp. logD <sub>7.4</sub> | Basic functions |
|------------------------|--------|--------------------------|-----------------|
| LYLGWI-NH <sub>2</sub> | 762.94 | 2.16±0.27                | 1               |

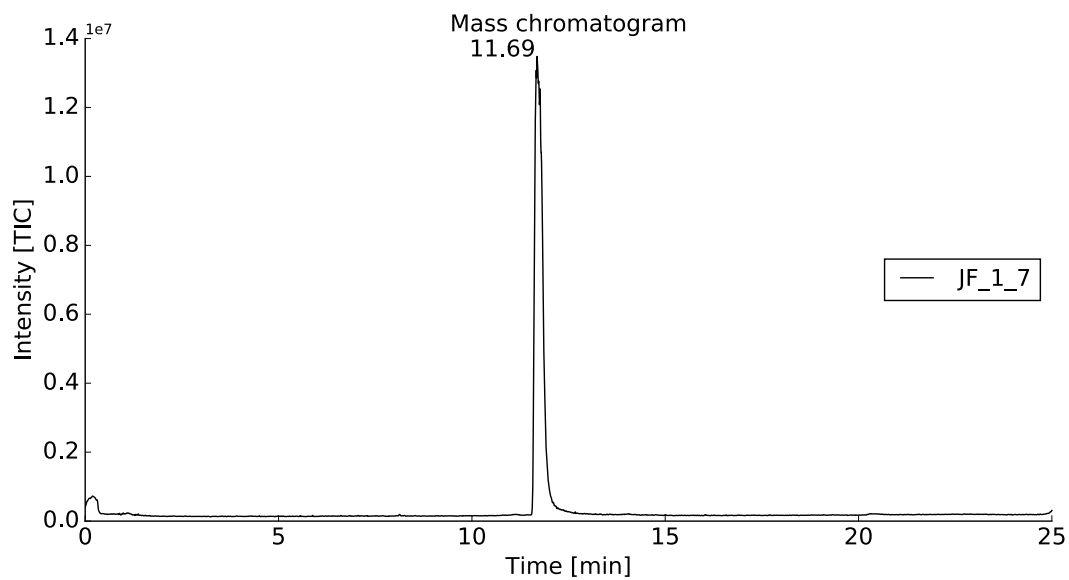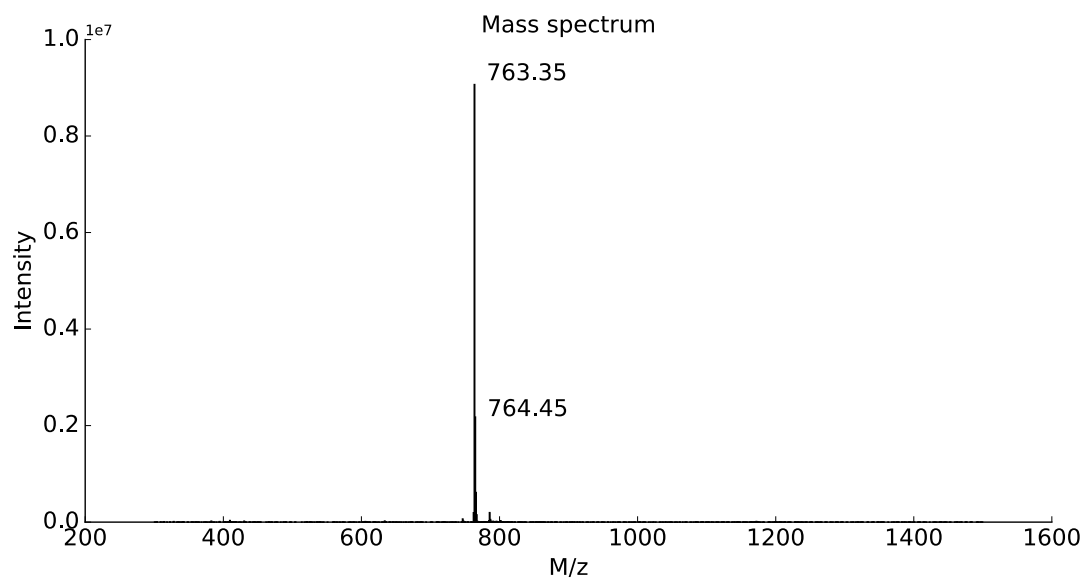

## Analytics of in-house peptide JF\_1\_8

| Sequence               | Mw     | Exp. logD <sub>7.4</sub> | Basic functions |
|------------------------|--------|--------------------------|-----------------|
| PWGYVA-NH <sub>2</sub> | 690.79 | -0.38±0.01               | 1               |

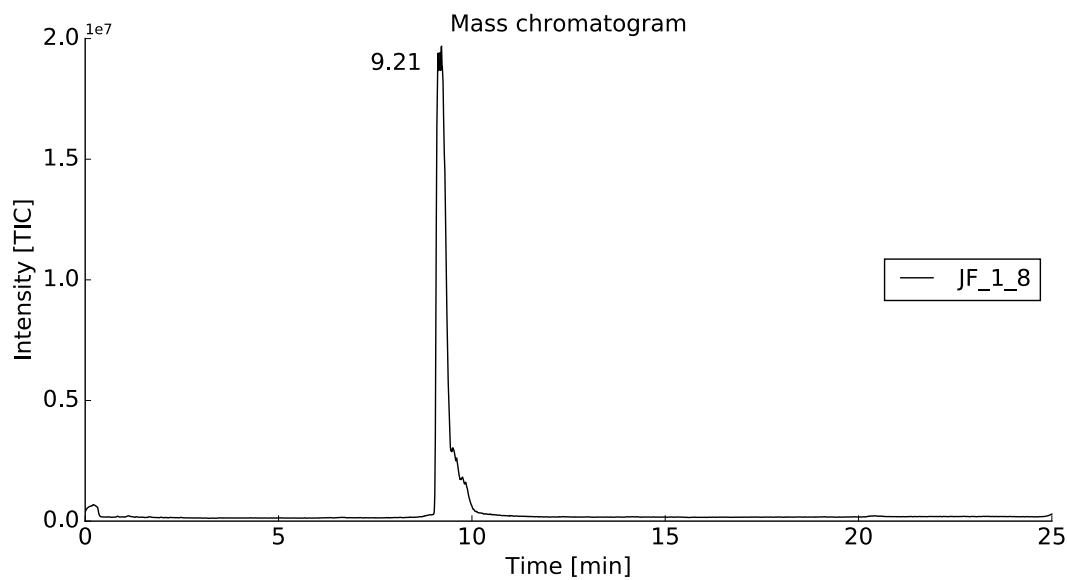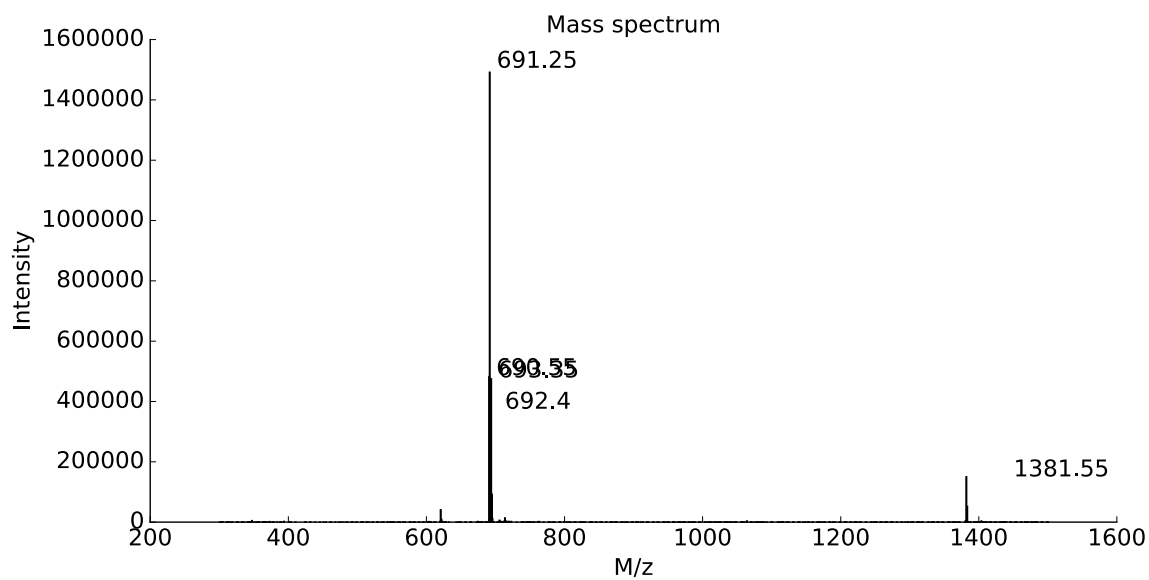



**Analytics of in-house peptide JF\_1\_10**

| Sequence               | Mw     | Exp. logD <sub>7.4</sub> | Basic functions |
|------------------------|--------|--------------------------|-----------------|
| VPAFII-NH <sub>2</sub> | 657.84 | 0.66±0.02                | 1               |

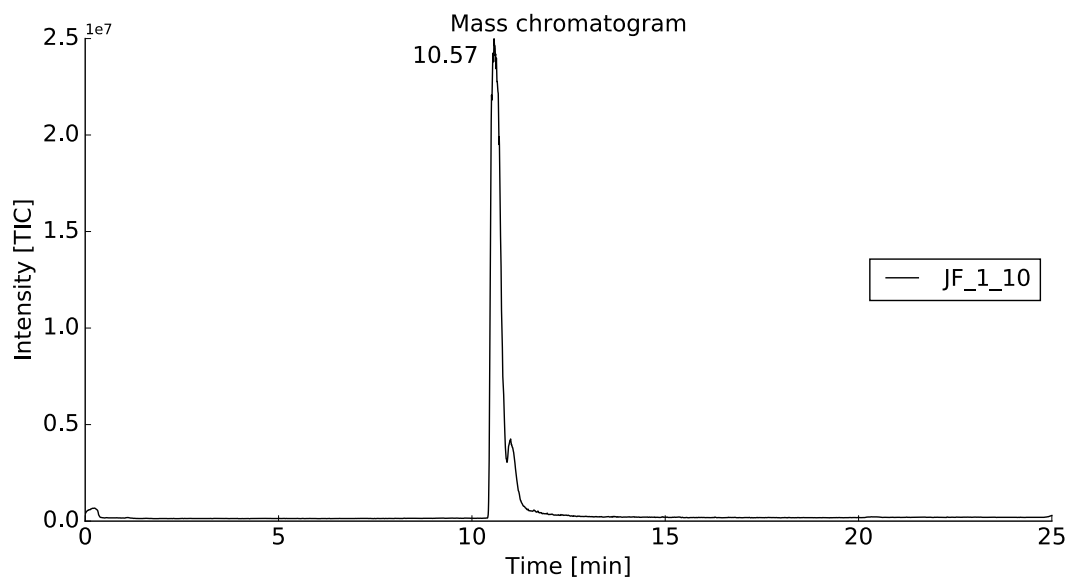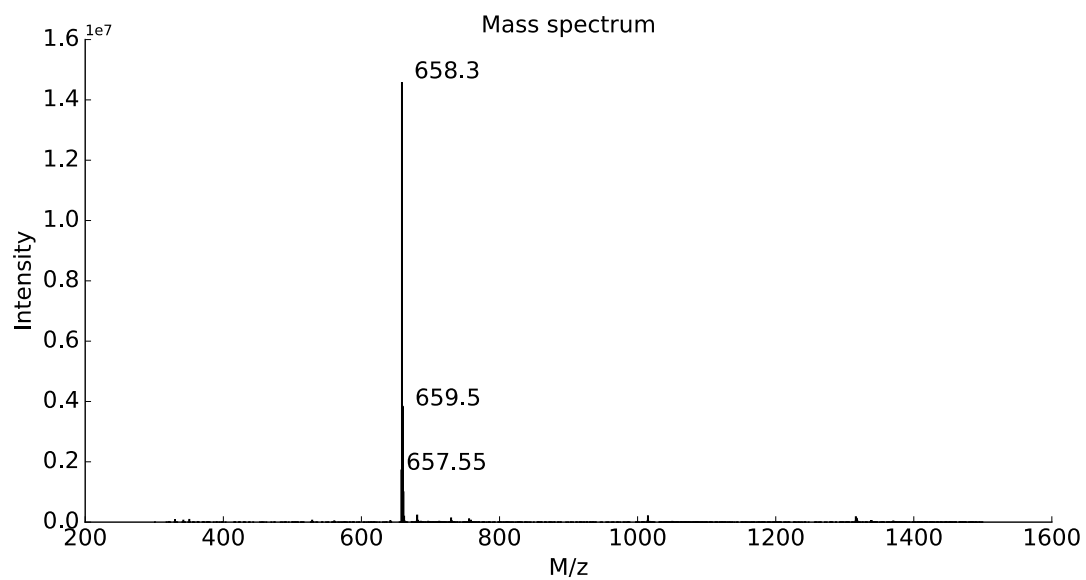

**Analytics of in-house peptide JF\_1\_11**

| Sequence               | Mw     | Exp. logD <sub>7.4</sub> | Basic functions |
|------------------------|--------|--------------------------|-----------------|
| WPKIYV-NH <sub>2</sub> | 803.99 | -1.82±0.19               | 2               |

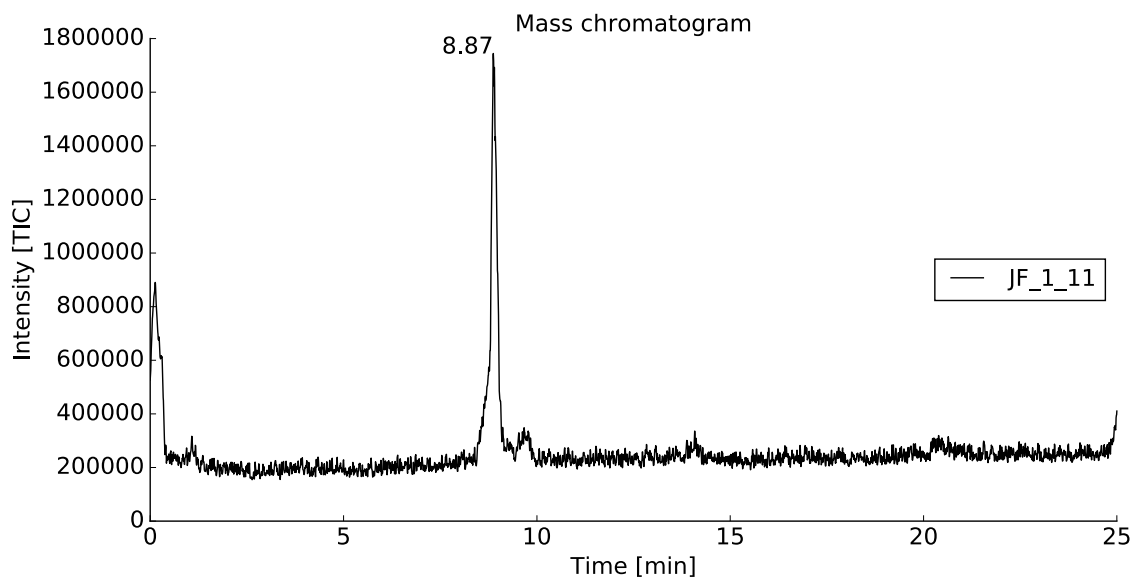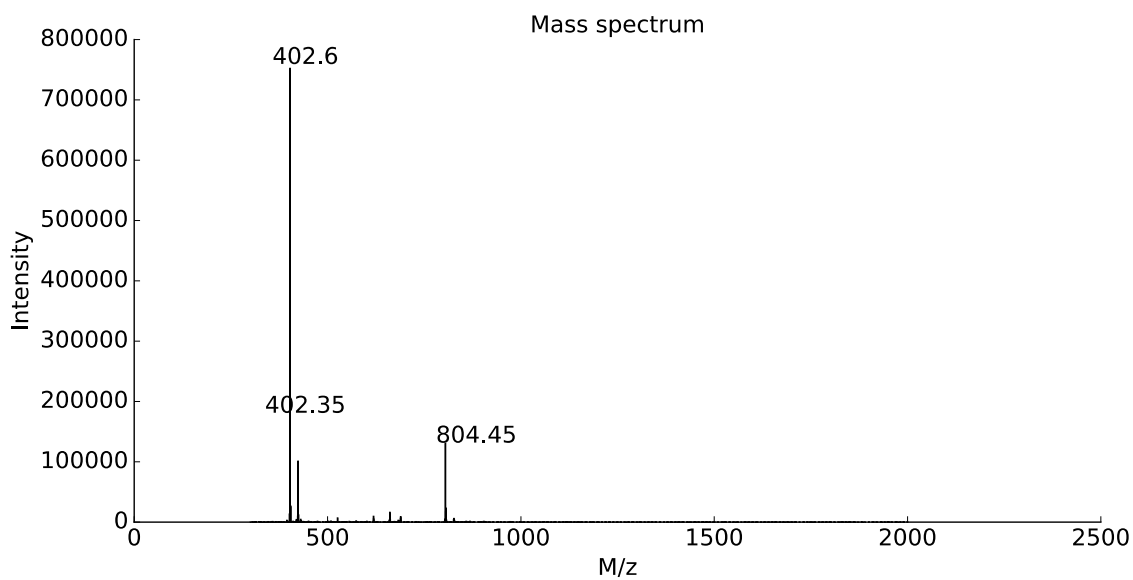

**Analytics of in-house peptide JF\_1\_13**

| Sequence               | Mw     | Exp. logD <sub>7.4</sub> | Basic functions |
|------------------------|--------|--------------------------|-----------------|
| VLIWFV-NH <sub>2</sub> | 774.99 | 2.35±0.31                | 1               |

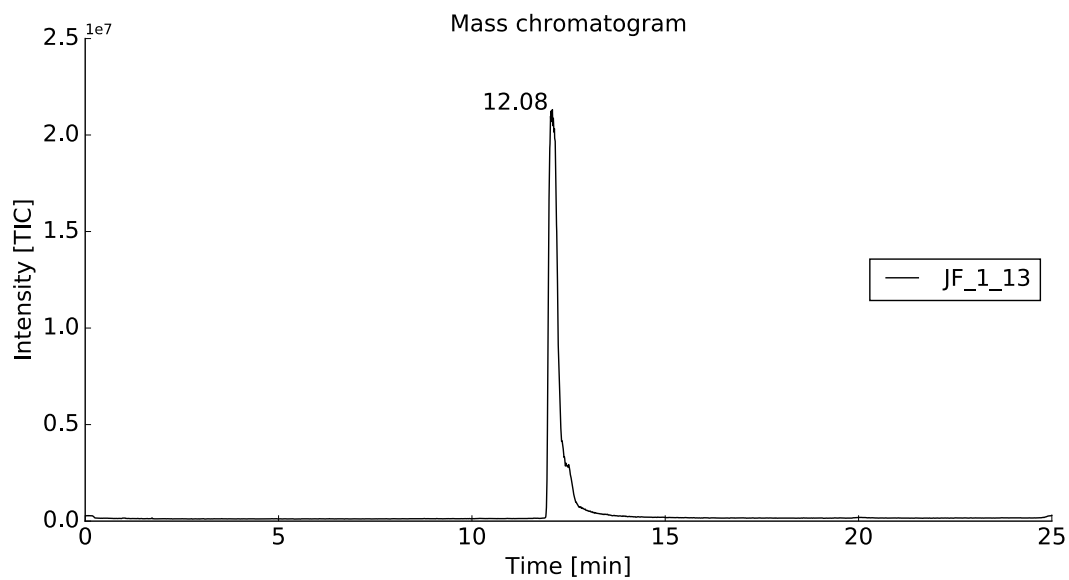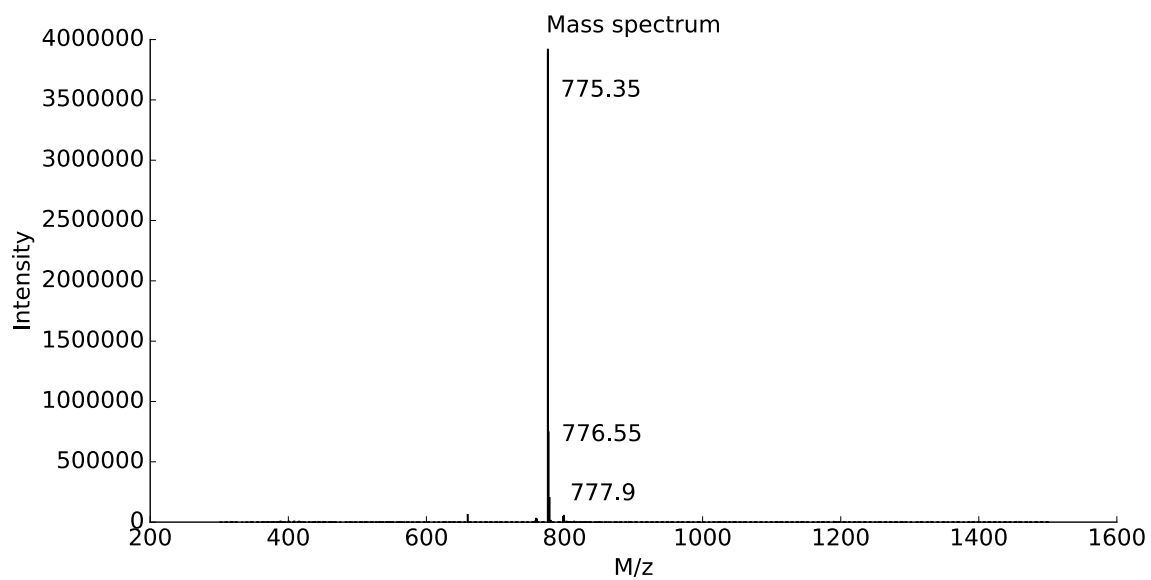

## Analytics of in-house peptide JF\_1\_14

| Sequence               | Mw     | Exp. logD <sub>7.4</sub> | Basic functions |
|------------------------|--------|--------------------------|-----------------|
| SVYLQP-NH <sub>2</sub> | 704.81 | -1.59±0.08               | 1               |

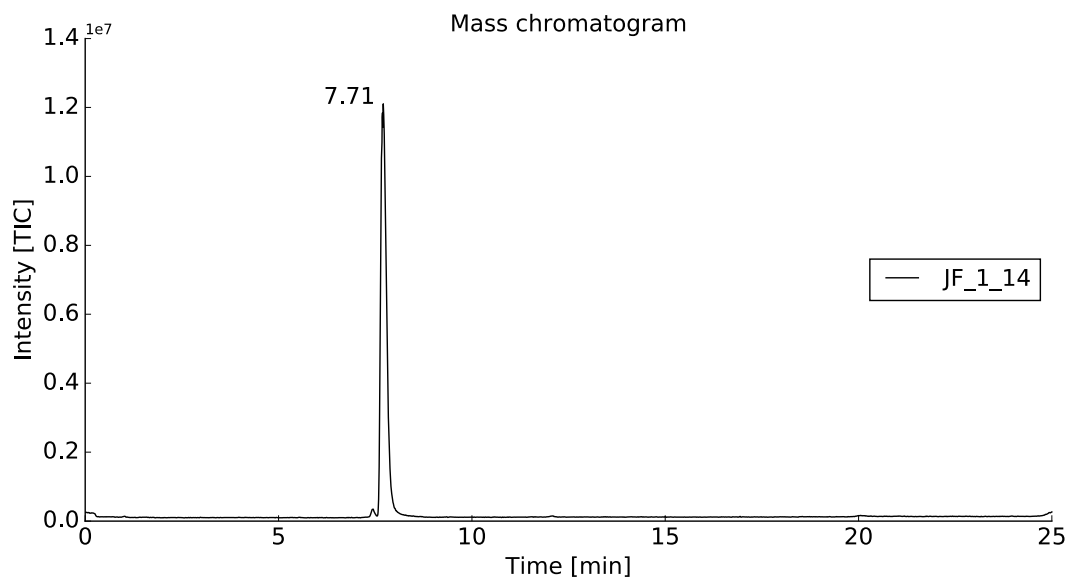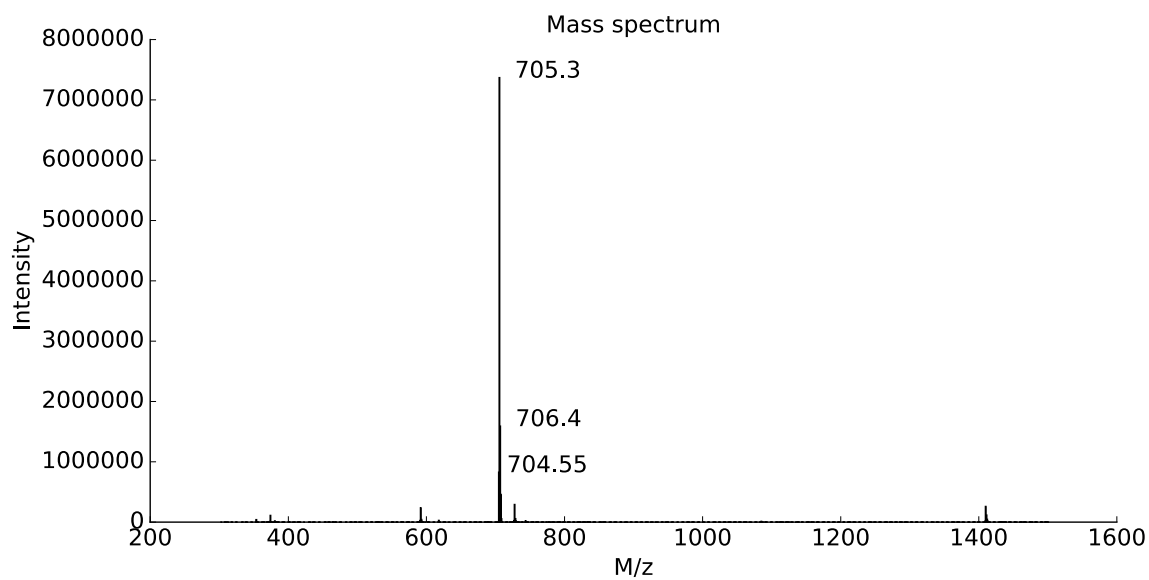

**Table S3.** LogD data of LIPOPEP and the In-House measured peptides. pH (aq) = pH of the aqueous of both phases at which SFM was conducted.

| ID             | Sequence         | SMILES                                                                                   | C-Terminus  | N-Terminus | Ionisable | logD (exp) | pH (aq) | Ref |
|----------------|------------------|------------------------------------------------------------------------------------------|-------------|------------|-----------|------------|---------|-----|
| <b>LIPOPEP</b> |                  |                                                                                          |             |            |           |            |         |     |
| 1              | AGA              | [H]N(C(C)=O)[C@H](C(NCC(N[C@H](C(NC(C)C)C)=O)C)=O)C                                      | CONHt-Butyl | NHCOCH3    | No        | -0.6       | 7.2     | 1   |
| 2              | AAA              | [H]N(C(C)=O)[C@H](C(NC(C)C(N[C@H](C(NC(C)C)C)=O)C)=O)C                                   | CONHt-Butyl | NHCOCH3    | No        | -0.51      | 7.2     | 1   |
| 3              | AFA              | [H]N(C(C)=O)[C@H](C(NC(CC1=CC=CC=C1)C(N[C@H](C(NC(C)C)C)=O)C)=O)C                        | CONHt-Butyl | NHCOCH3    | No        | 1.01       | 7.2     | 1   |
| 4              | AWA              | [H]N(C(C)=O)[C@H](C(N[C@H](C(N[C@H](C(NC(C)C)C)=O)C)=O)CC1=CNC2=C1C=CC=C2)=O)C           | CONHt-Butyl | NHCOCH3    | No        | 1.25       | 7.2     | 1   |
| 5              | APA              | [H]N(C(C)=O)[C@H](C(N1CCC[C@H]1C(N[C@H](C(NC(C)C)C)=O)C)=O)C                             | CONHt-Butyl | NHCOCH3    | No        | -0.39      | 7.2     | 1   |
| 6              | AHA              | O=C(N[C@H](C(=O)N[C@H](Cc1[nH]cnc1)C(=O)N[C@H](C(=O)NC(C)C)C)C                           | CONHt-Butyl | NHCOCH3    | Yes       | -0.48      | 7.2     | 1   |
| 7              | ADA              | [H]N(C(C)=O)[C@H](C(N[C@H](C(N[C@H](C(NC(C)C)C)=O)C)=O)CC(O)=O)C                         | CONHt-Butyl | NHCOCH3    | No        | -0.74      | 7.2     | 1   |
| 8              | AEA              | [H]N(C(C)=O)[C@H](C(N[C@H](CCC(O)=O)C(N[C@H](C(NC(C)C)C)=O)C)=O)C                        | CONHt-Butyl | NHCOCH3    | No        | -0.67      | 7.2     | 1   |
| 9              | (D-)FG           | O=C([O-])CNC(=O)[C@H]([NH3+])Cc1cccc1                                                    | COOH        | NH2        | Yes       | -2.16      | 7.2     | 2   |
| 10             | (D-)F(D-)FG      | O=C(N[C@H](Cc1cccc1)C(=O)N[C@H](Cc1cccc1)C(=O)[O-])C[NH3+]                               | COOH        | NH2        | Yes       | -1.46      | 7.2     | 2   |
| 11             | (D-)F(D-)F(D-)FG | O=C([O-])CNC(=O)[C@H](NC(=O)[C@H](NC(=O)[C@H]([NH3+])Cc1cccc1)Cc1cccc1)Cc1cccc1          | COOH        | NH2        | Yes       | -0.66      | 7.2     | 2   |
| 12             | (D-)F(D-)F       | [H]N(C(C)=O)[C@H](C(N[C@H](C(N)=O)CC1=CC=CC=C1)=O)CC2=CC=CC=C2                           | CONH2       | NHCOCH3    | No        | 1.19       | 7.2     | 2   |
| 13             | (D-)F(D-)F(D-)F  | [H]N(C(C)=O)[C@H](C(N[C@H](C(N[C@H](C(N)C)C)=O)CC1=CC=CC=C1)=O)CC2=CC=CC=C2)CC3=CC=CC=C3 | CONH2       | NHCOCH3    | No        | 2.3        | 7.2     | 2   |
| 14             | FL               | O=C(N[C@@H](CC(C)C)C(=O)[O-])[C@@H]([NH3+])Cc1cccc1                                      | COOH        | NH2        | Yes       | -1.17      | 7.0     | 3   |
| 15             | LF               | O=C(N[C@@H](Cc1cccc1)C(=O)[O-])[C@@H]([NH3+])CC(C)C                                      | COOH        | NH2        | Yes       | -1.15      | 7.0     | 3   |
| 16             | FF               | O=C(N[C@@H](Cc1cccc1)C(=O)[O-])[C@@H]([NH3+])Cc1cccc1                                    | COOH        | NH2        | Yes       | -0.85      | 7.0     | 3   |
| 17             | LL               | O=C(N[C@@H](CC(C)C)C(=O)[O-])[C@@H]([NH3+])CC(C)C                                        | COOH        | NH2        | Yes       | -1.46      | 7.0     | 3   |
| 18             | LV               | O=C(N[C@@H](C(C)C)C(=O)[O-])[C@@H]([NH3+])CC(C)C                                         | COOH        | NH2        | Yes       | -2.05      | 7.0     | 3   |
| 19             | VL               | O=C(N[C@@H](CC(C)C)C(=O)[O-])[C@@H]([NH3+])C(C)C                                         | COOH        | NH2        | Yes       | -2.07      | 7.0     | 3   |
| 20             | AI               | O=C(N[C@@H]([C@H](CC)C)C(=O)[O-])[C@@H]([NH3+])C                                         | COOH        | NH2        | Yes       | -2.60      | 7.0     | 3   |
| 21             | II               | O=C(N[C@@H]([C@H](CC)C)C(=O)[O-])[C@@H]([NH3+])[C@H](CC)C                                | COOH        | NH2        | Yes       | -1.82      | 7.0     | 3   |
| 22             | LI               | O=C(N[C@@H]([C@H](CC)C)C(=O)[O-])[C@@H]([NH3+])CC(C)C                                    | COOH        | NH2        | Yes       | -1.64      | 7.0     | 3   |
| 23             | VV               | O=C(N[C@@H](C(C)C)C(=O)[O-])[C@@H]([NH3+])C(C)C                                          | COOH        | NH2        | Yes       | -2.82      | 7.0     | 3   |
| 24             | WW               | O=C(N[C@@H](Cc1c2c([nH]c1)cccc2)C(=O)[O-])[C@@H]([NH3+])Cc1c2c([nH]c1)cccc2              | COOH        | NH2        | Yes       | -0.27      | 7.0     | 3   |
| 25             | WF               | O=C(N[C@@H](Cc1cccc1)C(=O)[O-])[C@@H]([NH3+])Cc1c2c([nH]c1)cccc2                         | COOH        | NH2        | Yes       | -0.47      | 7.0     | 3   |
| 26             | WA               | O=C(N[C@H](C(=O)[O-])C)[C@@H]([NH3+])Cc1c2c([nH]c1)cccc2                                 | COOH        | NH2        | Yes       | -1.98      | 7.0     | 3   |
| 27             | WL               | O=C(N[C@@H](CC(C)C)C(=O)[O-])[C@@H]([NH3+])Cc1c2c([nH]c1)cccc2                           | COOH        | NH2        | Yes       | -0.73      | 7.0     | 3   |
| 28             | WY               | Oc1ccc(cc1)C[C@H](NC(=O)[C@H]([NH3+])Cc1c2c([nH]c1)cccc2)C(=O)[O-]                       | COOH        | NH2        | Yes       | -1.13      | 7.0     | 3   |

|    |     |                                                                                             |      |     |     |       |     |   |
|----|-----|---------------------------------------------------------------------------------------------|------|-----|-----|-------|-----|---|
| 29 | LY  | <chem>Oc1ccc(cc1)C[C@H](NC(=O)[C@@H]([NH3+])CC(C)C(=O)[O-])</chem>                          | COOH | NH2 | Yes | -1.94 | 7.0 | 3 |
| 30 | YL  | <chem>Oc1ccc(cc1)C[C@H]([NH3+])C(=O)N[C@@H](CC(C)C(=O)[O-])</chem>                          | COOH | NH2 | Yes | -1.75 | 7.0 | 3 |
| 31 | VY  | <chem>Oc1ccc(cc1)C[C@H](NC(=O)[C@@H]([NH3+])C(C)C(=O)[O-])</chem>                           | COOH | NH2 | Yes | -2.52 | 7.0 | 3 |
| 32 | FY  | <chem>Oc1ccc(cc1)C[C@H](NC(=O)[C@@H]([NH3+])Cc1cccc1)C(=O)[O-]</chem>                       | COOH | NH2 | Yes | -1.68 | 7.0 | 3 |
| 33 | YY  | <chem>Oc1ccc(cc1)C[C@H](NC(=O)[C@@H]([NH3+])Cc1ccc(O)cc1)C(=O)[O-]</chem>                   | COOH | NH2 | Yes | -1.87 | 7.0 | 3 |
| 34 | LM  | <chem>S(CC[C@H](NC(=O)[C@@H]([NH3+])CC(C)C(=O)[O-])C</chem>                                 | COOH | NH2 | Yes | -1.87 | 7.0 | 3 |
| 35 | ML  | <chem>S(CC[C@H]([NH3+])C(=O)N[C@@H](CC(C)C(=O)[O-])C</chem>                                 | COOH | NH2 | Yes | -1.84 | 7.0 | 3 |
| 36 | MV  | <chem>S(CC[C@H]([NH3+])C(=O)N[C@@H](C(C)C)C(=O)[O-])C</chem>                                | COOH | NH2 | Yes | -2.53 | 7.0 | 3 |
| 37 | FM  | <chem>S(CC[C@H](NC(=O)[C@@H]([NH3+])Cc1cccc1)C(=O)[O-])C</chem>                             | COOH | NH2 | Yes | -1.59 | 7.0 | 3 |
| 38 | SL  | <chem>OC[C@H]([NH3+])C(=O)N[C@@H](CC(C)C(=O)[O-])</chem>                                    | COOH | NH2 | Yes | -2.49 | 7.0 | 3 |
| 39 | PF  | <chem>O=C(N[C@@H](Cc1cccc1)C(=O)[O-])[C@H]1[NH2+][CCC1]</chem>                              | COOH | NH2 | Yes | -2.07 | 7.0 | 3 |
| 40 | PL  | <chem>O=C(N[C@@H](CC(C)C)C(=O)[O-])[C@H]1[NH2+][CCC1]</chem>                                | COOH | NH2 | Yes | -2.41 | 7.0 | 3 |
| 41 | PI  | <chem>O=C(N[C@@H]([C@H](CC)C)C(=O)[O-])[C@H]1[NH2+][CCC1]</chem>                            | COOH | NH2 | Yes | -2.56 | 7.0 | 3 |
| 42 | FP  | <chem>O=C([O-])[C@H]1N(CCC1)C(=O)[C@@H]([NH3+])Cc1cccc1</chem>                              | COOH | NH2 | Yes | -1.36 | 7.0 | 3 |
| 43 | LP  | <chem>O=C([O-])[C@H]1N(CCC1)C(=O)[C@@H]([NH3+])CC(C)C</chem>                                | COOH | NH2 | Yes | -1.76 | 7.0 | 3 |
| 44 | IP  | <chem>O=C([O-])[C@H]1N(CCC1)C(=O)[C@@H]([NH3+])[C@H](CC)C</chem>                            | COOH | NH2 | Yes | -1.79 | 7.0 | 3 |
| 45 | FFF | <chem>O=C(N[C@@H](Cc1cccc1)C(=O)[O-])[C@@H](NC(=O)[C@@H]([NH3+])Cc1cccc1)Cc1cccc1</chem>    | COOH | NH2 | Yes | -0.02 | 7.0 | 3 |
| 46 | GFF | <chem>O=C(N[C@@H](Cc1cccc1)C(=O)N[C@@H](Cc1cccc1)C(=O)[O-])[C@H]1[NH3+]</chem>              | COOH | NH2 | Yes | -1.33 | 7.0 | 3 |
| 47 | FVG | <chem>O=C([O-])CNC(=O)[C@@H](NC(=O)[C@@H]([NH3+])Cc1cccc1)C(C)C</chem>                      | COOH | NH2 | Yes | -2.33 | 7.0 | 3 |
| 48 | FVF | <chem>O=C(N[C@@H](Cc1cccc1)C(=O)[O-])[C@@H](NC(=O)[C@@H]([NH3+])Cc1cccc1)C(C)C</chem>       | COOH | NH2 | Yes | -0.76 | 7.0 | 3 |
| 49 | FVA | <chem>O=C(N[C@H](C(=O)[O-])C)[C@@H](NC(=O)[C@@H]([NH3+])Cc1cccc1)C(C)C</chem>               | COOH | NH2 | Yes | -2.19 | 7.0 | 3 |
| 50 | LVV | <chem>O=C(N[C@@H](C(C)C)C(=O)[O-])[C@@H](NC(=O)[C@@H]([NH3+])CC(C)C)C(C)C</chem>            | COOH | NH2 | Yes | -2.10 | 7.0 | 3 |
| 51 | LII | <chem>O=C(N[C@@H]([C@H](CC)C)C(=O)N[C@@H]([C@H](CC)C)C(=O)[O-])[C@@H]([NH3+])CC(C)C</chem>  | COOH | NH2 | Yes | -1.11 | 7.0 | 3 |
| 52 | LVL | <chem>O=C(N[C@@H](CC(C)C)C(=O)[O-])[C@@H](NC(=O)[C@@H]([NH3+])CC(C)C)C(C)C</chem>           | COOH | NH2 | Yes | -1.57 | 7.0 | 3 |
| 53 | LAL | <chem>O=C(N[C@@H](CC(C)C)C(=O)[O-])[C@@H](NC(=O)[C@@H]([NH3+])CC(C)C)C</chem>               | COOH | NH2 | Yes | -2.03 | 7.0 | 3 |
| 54 | LLL | <chem>O=C(N[C@@H](CC(C)C)C(=O)[O-])[C@@H](NC(=O)[C@@H]([NH3+])CC(C)C)CC(C)C</chem>          | COOH | NH2 | Yes | -0.94 | 7.0 | 3 |
| 55 | WGG | <chem>O=C(NCC(=O)[O-])CNC(=O)[C@@H]([NH3+])Cc1c2c([nH]c1)cccc2</chem>                       | COOH | NH2 | Yes | -2.72 | 7.0 | 3 |
| 56 | WFA | <chem>O=C(N[C@H](C(=O)[O-])C)[C@@H](NC(=O)[C@@H]([NH3+])Cc1c2c([nH]c1)cccc2)Cc1cccc1</chem> | COOH | NH2 | Yes | -1.00 | 7.0 | 3 |

|    |      |                                                                                                 |      |     |     |       |     |   |
|----|------|-------------------------------------------------------------------------------------------------|------|-----|-----|-------|-----|---|
| 57 | WWL  | O=C(N[C@@H](CC(C)C)C(=O)[O-])[C@@H](NC(=O)[C@@H]([NH3+])Cc1c2c([nH]c1)cccc2)Cc1c2c([nH]c1)cccc2 | COOH | NH2 | Yes | 0.36  | 7.0 | 3 |
| 58 | LLY  | Oc1ccc(cc1)C[C@H](NC(=O)[C@@H](NC(=O)[C@@H]([NH3+])CC(C)C)CC(C)C(=O)[O-])                       | COOH | NH2 | Yes | -1.34 | 7.0 | 3 |
| 59 | VFY  | Oc1ccc(cc1)C[C@H](NC(=O)[C@@H](NC(=O)[C@@H]([NH3+])C(C)C)Cc1cccc1)C(=O)[O-]                     | COOH | NH2 | Yes | -1.50 | 7.0 | 3 |
| 60 | GFY  | Oc1ccc(cc1)C[C@H](NC(=O)[C@@H](NC(=O)C[NH3+])Cc1cccc1)C(=O)[O-]                                 | COOH | NH2 | Yes | -1.96 | 7.0 | 3 |
| 61 | YLV  | Oc1ccc(cc1)C[C@H]([NH3+])C(=O)N[C@@H](CC(C)C)C(=O)N[C@@H](C(C)C)C(=O)[O-]                       | COOH | NH2 | Yes | -1.45 | 7.0 | 3 |
| 62 | YVF  | Oc1ccc(cc1)C[C@H]([NH3+])C(=O)N[C@@H](C(C)C)C(=O)N[C@@H](Cc1cccc1)C(=O)[O-]                     | COOH | NH2 | Yes | -1.37 | 7.0 | 3 |
| 63 | YGF  | Oc1ccc(cc1)C[C@H]([NH3+])C(=O)NCC(=O)N[C@@H](C(C)C)C(=O)[O-]                                    | COOH | NH2 | Yes | -1.86 | 7.0 | 3 |
| 64 | YYL  | Oc1ccc(cc1)C[C@H](NC(=O)[C@@H]([NH3+])Cc1ccc(O)cc1)C(=O)N[C@@H](CC(C)C)C(=O)[O-]                | COOH | NH2 | Yes | -1.38 | 7.0 | 3 |
| 65 | AYI  | Oc1ccc(cc1)C[C@H](NC(=O)[C@@H]([NH3+])C(=O)N[C@@H]([C@H](CC)C)C(=O)[O-])                        | COOH | NH2 | Yes | -2.04 | 7.0 | 3 |
| 66 | IYV  | Oc1ccc(cc1)C[C@H](NC(=O)[C@@H]([NH3+])C(=O)N[C@@H](C(C)C)C(=O)[O-])                             | COOH | NH2 | Yes | -1.77 | 7.0 | 3 |
| 67 | MLF  | S(Cc1ccc(O)cc1)C(=O)N[C@@H](CC(C)C)C(=O)N[C@@H](Cc1cccc1)C(=O)[O-]                              | COOH | NH2 | Yes | -1.03 | 7.0 | 3 |
| 68 | LSL  | OC[C@H](NC(=O)[C@@H]([NH3+])CC(C)C(=O)N[C@@H](CC(C)C)C(=O)[O-])                                 | COOH | NH2 | Yes | -2.35 | 7.0 | 3 |
| 69 | ISL  | OC[C@H](NC(=O)[C@@H]([NH3+])C(=O)N[C@@H](CC(C)C)C(=O)[O-])                                      | COOH | NH2 | Yes | -2.28 | 7.0 | 3 |
| 70 | ISI  | OC[C@H](NC(=O)[C@@H]([NH3+])C(=O)N[C@@H](C(C)C)C(=O)[O-])                                       | COOH | NH2 | Yes | -2.64 | 7.0 | 3 |
| 71 | SLI  | OC[C@H]([NH3+])C(=O)N[C@@H](CC(C)C)C(=O)N[C@@H](C(C)C)C(=O)[O-]                                 | COOH | NH2 | Yes | -1.99 | 7.0 | 3 |
| 72 | SLL  | OC[C@H]([NH3+])C(=O)N[C@@H](CC(C)C)C(=O)N[C@@H](CC(C)C)C(=O)[O-]                                | COOH | NH2 | Yes | -2.03 | 7.0 | 3 |
| 73 | FIT  | O=C(N[C@@H]([C@H](CC)C)C(=O)N[C@@H]([C@H](O)C)C(=O)[O-])[C@@H]([NH3+])Cc1cccc1                  | COOH | NH2 | Yes | -1.95 | 7.0 | 3 |
| 74 | LIT  | O=C(N[C@@H]([C@H](CC)C)C(=O)N[C@@H]([C@H](O)C)C(=O)[O-])[C@@H]([NH3+])CC(C)C                    | COOH | NH2 | Yes | -2.14 | 7.0 | 3 |
| 75 | IIT  | O=C(N[C@@H]([C@H](O)C)C(=O)[O-])[C@@H](NC(=O)[C@@H]([NH3+])C(=O)N[C@@H](CC)C)[C@H](CC)C         | COOH | NH2 | Yes | -2.23 | 7.0 | 3 |
| 76 | LTI  | O=C(N[C@@H]([C@H](O)C)C(=O)N[C@@H]([C@H](CC)C)C(=O)[O-])[C@@H]([NH3+])CC(C)C                    | COOH | NH2 | Yes | -2.30 | 7.0 | 3 |
| 77 | TLI  | O=C(N[C@@H]([C@H](CC)C)C(=O)[O-])[C@@H](NC(=O)[C@@H]([NH3+])C(=O)N[C@@H](O)C)CC(C)C             | COOH | NH2 | Yes | -1.66 | 7.0 | 3 |
| 78 | TVL  | O=C(N[C@@H](CC(C)C)C(=O)[O-])[C@@H](NC(=O)[C@@H]([NH3+])C(=O)N[C@@H](O)C)C(C)C                  | COOH | NH2 | Yes | -1.97 | 7.0 | 3 |
| 79 | PLL  | O=C(N[C@@H](CC(C)C)C(=O)N[C@@H](CC(C)C)C(=O)[O-])[C@@H]1[NH2+]CCC1                              | COOH | NH2 | Yes | -1.64 | 7.0 | 3 |
| 80 | LPL  | O=C(N[C@@H](CC(C)C)C(=O)[O-])[C@@H]1N(CCC1)C(=O)[C@@H]([NH3+])CC(C)C                            | COOH | NH2 | Yes | -1.56 | 7.0 | 3 |
| 81 | LLP  | O=C([O-])[C@@H]1N(CCC1)C(=O)[C@@H](NC(=O)[C@@H]([NH3+])CC(C)C)CC(C)C                            | COOH | NH2 | Yes | -1.58 | 7.0 | 3 |
| 82 | IPI  | O=C(N[C@@H]([C@H](CC)C)C(=O)[O-])[C@@H]1N(CCC1)C(=O)[C@@H]([NH3+])C(=O)N[C@@H](CC)C             | COOH | NH2 | Yes | -1.65 | 7.0 | 3 |
| 83 | FGGF | O=C(NCC(=O)N[C@@H](Cc1cccc1)C(=O)[O-])CNC(=O)[C@@H]([NH3+])Cc1cccc1                             | COOH | NH2 | Yes | -1.51 | 7.0 | 3 |
| 84 | VAAF | O=C(N[C@@H](Cc1cccc1)C(=O)[O-])[C@@H](NC(=O)[C@@H](NC(=O)[C@@H]([NH3+])C(C)C)C)C                | COOH | NH2 | Yes | -1.91 | 7.0 | 3 |
| 85 | LLVF | O=C(N[C@@H](Cc1cccc1)C(=O)[O-])[C@@H](NC(=O)[C@@H](NC(=O)[C@@H]([NH3+])CC(C)C)CC(C)C)C(C)C      | COOH | NH2 | Yes | -0.25 | 7.0 | 3 |

|     |      |                                                                                                          |      |     |     |       |     |   |
|-----|------|----------------------------------------------------------------------------------------------------------|------|-----|-----|-------|-----|---|
| 86  | LLLV | O=C(N[C@@H](CC(C)C)C(=O)N[C@@H](C(C)C)C(=O)[O-])[C@@H](NC(=O)[C@@H]([NH3+])CC(C)C)CC(C)C                 | COOH | NH2 | Yes | -0.51 | 7.0 | 3 |
| 87  | VGFF | O=C(N[C@@H](Cc1ccccc1)C(=O)N[C@@H](Cc1ccccc1)C(=O)[O-])CNC(=O)[C@@H]([NH3+])C(C)C                        | COOH | NH2 | Yes | -0.51 | 7.0 | 3 |
| 88  | AVLL | O=C(N[C@@H](CC(C)C)C(=O)N[C@@H](CC(C)C)C(=O)[O-])[C@@H](NC(=O)[C@@H]([NH3+])C(C)C)C                      | COOH | NH2 | Yes | -1.74 | 7.0 | 3 |
| 89  | IAGF | O=C(N[C@@H](Cc1ccccc1)C(=O)[O-])CNC(=O)[C@@H](NC(=O)[C@@H]([NH3+])[C@@H](CC)C)C                          | COOH | NH2 | Yes | -1.78 | 7.0 | 3 |
| 90  | FFFF | O=C(N[C@@H](Cc1ccccc1)C(=O)N[C@@H](Cc1ccccc1)C(=O)[O-])[C@@H](NC(=O)[C@@H]([NH3+])Cc1ccccc1)Cc1ccccc1    | COOH | NH2 | Yes | 1.63  | 7.0 | 3 |
| 91  | LLGF | O=C(N[C@@H](Cc1ccccc1)C(=O)[O-])CNC(=O)[C@@H](NC(=O)[C@@H]([NH3+])CC(C)C)CC(C)C                          | COOH | NH2 | Yes | -0.42 | 7.0 | 3 |
| 92  | LLAF | O=C(N[C@@H](C(=O)N[C@@H](Cc1ccccc1)C(=O)[O-])[C@@H](NC(=O)[C@@H]([NH3+])CC(C)C)C(C)C                     | COOH | NH2 | Yes | -1.00 | 7.0 | 3 |
| 93  | LLLF | O=C(N[C@@H](CC(C)C)C(=O)N[C@@H](Cc1ccccc1)C(=O)[O-])[C@@H](NC(=O)[C@@H]([NH3+])CC(C)C)CC(C)C             | COOH | NH2 | Yes | 0.24  | 7.0 | 3 |
| 94  | IIVV | O=C(N[C@@H](C(C)C)C(=O)[O-])[C@@H](NC(=O)[C@@H](NC(=O)[C@@H]([NH3+])[C@@H](CC)C)[C@@H](CC)C)C(C)C        | COOH | NH2 | Yes | -1.41 | 7.0 | 3 |
| 95  | IIGF | O=C(N[C@@H](Cc1ccccc1)C(=O)[O-])CNC(=O)[C@@H](NC(=O)[C@@H]([NH3+])[C@@H](CC)C)[C@@H](CC)C                | COOH | NH2 | Yes | -0.99 | 7.0 | 3 |
| 96  | IAAI | O=C(N[C@@H](C(=O)N[C@@H]([C@@H](CC)C)C(=O)[O-])[C@@H](NC(=O)[C@@H]([NH3+])[C@@H](CC)C)C                  | COOH | NH2 | Yes | -2.82 | 7.0 | 3 |
| 97  | FFGF | O=C(N[C@@H](Cc1ccccc1)C(=O)[O-])CNC(=O)[C@@H](NC(=O)[C@@H]([NH3+])Cc1ccccc1)Cc1ccccc1                    | COOH | NH2 | Yes | 0.17  | 7.0 | 3 |
| 98  | VLVL | O=C(N[C@@H](CC(C)C)C(=O)[O-])[C@@H](NC(=O)[C@@H](NC(=O)[C@@H]([NH3+])C(C)C)CC(C)C)C(C)C                  | COOH | NH2 | Yes | -1.23 | 7.0 | 3 |
| 99  | WLLV | O=C(N[C@@H](CC(C)C)C(=O)N[C@@H](C(C)C)C(=O)[O-])[C@@H](NC(=O)[C@@H]([NH3+])Cc1c2c([nH]c1)cccc2)CC(C)C    | COOH | NH2 | Yes | 0.23  | 7.0 | 3 |
| 100 | WGLL | O=C(N[C@@H](CC(C)C)C(=O)N[C@@H](CC(C)C)C(=O)[O-])CNC(=O)[C@@H]([NH3+])Cc1c2c([nH]c1)cccc2                | COOH | NH2 | Yes | 0.06  | 7.0 | 3 |
| 101 | YILG | Oc1ccc(cc1)C[C@@H]([NH3+])C(=O)N[C@@H]([C@@H](CC)C)C(=O)N[C@@H](CC(C)C)C(=O)NCC(=O)[O-]                  | COOH | NH2 | Yes | -1.49 | 7.0 | 3 |
| 102 | FVYF | Oc1ccc(cc1)C[C@@H](NC(=O)[C@@H](NC(=O)[C@@H]([NH3+])Cc1ccccc1)C(C)C)C(=O)N[C@@H](Cc1ccccc1)C(=O)[O-]     | COOH | NH2 | Yes | -0.32 | 7.0 | 3 |
| 103 | IYIV | Oc1ccc(cc1)C[C@@H](NC(=O)[C@@H]([NH3+])[C@@H](CC)C)C(=O)N[C@@H]([C@@H](CC)C)C(=O)N[C@@H](C(C)C)C(=O)[O-] | COOH | NH2 | Yes | -1.09 | 7.0 | 3 |
| 104 | VFLT | O=C(N[C@@H](CC(C)C)C(=O)N[C@@H]([C@@H](O)C)C(=O)[O-])[C@@H](NC(=O)[C@@H]([NH3+])C(C)C)Cc1ccccc1          | COOH | NH2 | Yes | -1.32 | 7.0 | 3 |
| 105 | MILI | S(CC[C@@H]([NH3+])C(=O)N[C@@H]([C@@H](CC)C)C(=O)N[C@@H](CC(C)C)C(=O)N[C@@H]([C@                          | COOH | NH2 | Yes | -0.49 | 7.0 | 3 |



|     |       |                                                                                                               |      |     |     |       |     |   |  |
|-----|-------|---------------------------------------------------------------------------------------------------------------|------|-----|-----|-------|-----|---|--|
|     |       | H]([C@H]C(=O)[O-])C                                                                                           |      |     |     |       |     |   |  |
| 106 | VMFI  | S(CC[C@H](NC(=O)[C@@H]([NH3+])C(C)C(=O)N[C@@H](Cc1ccccc1)C(=O)N[C@@H]([C@H](C)C)C(=O)[O-])C                   | COOH | NH2 | Yes | -0.63 | 7.0 | 3 |  |
| 107 | PLLL  | O=C(N[C@@H](CC(C)C)C(=O)N[C@@H](CC(C)C)C(=O)N[C@@H](CC(C)C)C(=O)[O-])[C@H]1[NH2+][CCC1                        | COOH | NH2 | Yes | -1.06 | 7.0 | 3 |  |
| 108 | LPLL  | O=C(N[C@@H](CC(C)C)C(=O)N[C@@H](CC(C)C)C(=O)[O-])[C@H]1N(CCC1)C(=O)[C@@H]([NH3+])CC(C)C                       | COOH | NH2 | Yes | -0.92 | 7.0 | 3 |  |
| 109 | LLPL  | O=C(N[C@@H](CC(C)C)C(=O)[O-])[C@H]1N(CCC1)C(=O)[C@@H](NC(=O)[C@@H]([NH3+])CC(C)C)CC(C)C                       | COOH | NH2 | Yes | -1.00 | 7.0 | 3 |  |
| 110 | LLLP  | O=C([O-])[C@H]1N(CCC1)C(=O)[C@@H](NC(=O)[C@@H](NC(=O)[C@@H]([NH3+])CC(C)C)CC(C)C)C                            | COOH | NH2 | Yes | -1.18 | 7.0 | 3 |  |
| 111 | IPGI  | O=C(NCC(=O)N[C@@H]([C@H](CC(C)C)C(=O)[O-])[C@H]1N(CCC1)C(=O)[C@@H]([NH3+])[C@H](CC)C                          | COOH | NH2 | Yes | -1.69 | 7.0 | 3 |  |
| 112 | VPVL  | O=C(N[C@@H](C(C)C)C(=O)N[C@@H](CC(C)C)C(=O)[O-])[C@H]1N(CCC1)C(=O)[C@@H]([NH3+])C(C)C                         | COOH | NH2 | Yes | -1.91 | 7.0 | 3 |  |
| 113 | VPGV  | O=C(NCC(=O)N[C@@H](C(C)C)C(=O)[O-])[C@H]1N(CCC1)C(=O)[C@@H]([NH3+])C(C)C                                      | COOH | NH2 | Yes | -2.83 | 7.0 | 3 |  |
| 114 | YPGW  | Oc1ccc(cc1)C[C@H]([NH3+])C(=O)N1CCC[C@H]1C(=O)NCC(=O)N[C@@H](Cc1c2c([nH]c1)cccc2)C(=O)[O-]                    | COOH | NH2 | Yes | -1.25 | 7.0 | 3 |  |
| 115 | YPGI  | Oc1ccc(cc1)C[C@H]([NH3+])C(=O)N1CCC[C@H]1C(=O)NCC(=O)N[C@@H]([C@H](CC(C)C)C(=O)[O-])                          | COOH | NH2 | Yes | -1.65 | 7.0 | 3 |  |
| 116 | GGFVF | O=C(N[C@@H](Cc1ccccc1)C(=O)N[C@@H](C(C)C)C(=O)N[C@@H](Cc1ccccc1)C(=O)[O-])CNC(=O)C[NH3+]                      | COOH | NH2 | Yes | -1.40 | 7.0 | 3 |  |
| 117 | VFVGL | O=C(N[C@@H](CC(C)C)C(=O)[O-])CNC(=O)[C@@H](NC(=O)[C@@H](NC(=O)[C@@H]([NH3+])C(C)C)Cc1ccccc1)C(C)C             | COOH | NH2 | Yes | -0.97 | 7.0 | 3 |  |
| 118 | VGFVF | O=C(N[C@@H](Cc1ccccc1)C(=O)N[C@@H](C(C)C)C(=O)N[C@@H](Cc1ccccc1)C(=O)[O-])CNC(=O)[C@@H]([NH3+])C(C)C          | COOH | NH2 | Yes | -0.50 | 7.0 | 3 |  |
| 119 | GAALL | O=C(N[C@@H](C(=O)N[C@@H](C(=O)N[C@@H](CC(C)C)C(=O)N[C@@H](CC(C)C)C(=O)[O-])C)C[NH3+]                          | COOH | NH2 | Yes | -2.55 | 7.0 | 3 |  |
| 120 | AFGVF | O=C(N[C@@H](C(C)C)C(=O)N[C@@H](Cc1ccccc1)C(=O)[O-])CNC(=O)[C@@H](NC(=O)[C@@H]([NH3+])C)Cc1ccccc1              | COOH | NH2 | Yes | -0.59 | 7.0 | 3 |  |
| 121 | AGFVF | O=C(N[C@@H](Cc1ccccc1)C(=O)N[C@@H](C(C)C)C(=O)N[C@@H](Cc1ccccc1)C(=O)[O-])CNC(=O)[C@@H]([NH3+])C              | COOH | NH2 | Yes | -1.10 | 7.0 | 3 |  |
| 122 | LIIGA | O=C(N[C@@H](C(=O)[O-])C)CNC(=O)[C@@H](NC(=O)[C@@H](NC(=O)[C@@H]([NH3+])CC(C)C)[C@H](CC)C)[C@H](CC)C           | COOH | NH2 | Yes | -1.65 | 7.0 | 3 |  |
| 123 | GLLGF | O=C(N[C@@H](Cc1ccccc1)C(=O)[O-])CNC(=O)[C@@H](NC(=O)[C@@H](NC(=O)C[NH3+])CC(C)C)CC(C)C                        | COOH | NH2 | Yes | -0.18 | 7.0 | 3 |  |
| 124 | ALLGF | O=C(N[C@@H](Cc1ccccc1)C(=O)[O-])CNC(=O)[C@@H](NC(=O)[C@@H](NC(=O)[C@@H]([NH3+])C)CC(C)C)CC(C)C                | COOH | NH2 | Yes | -0.63 | 7.0 | 3 |  |
| 125 | IIIG  | O=C([O-])CNC(=O)[C@@H](NC(=O)[C@@H](NC(=O)[C@@H](NC(=O)[C@@H]([NH3+])[C@H](CC)C)[C@H](CC)C)[C@H](CC)C         | COOH | NH2 | Yes | -0.97 | 7.0 | 3 |  |
| 126 | IVVVI | O=C(N[C@@H](C(C)C)C(=O)N[C@@H]([C@H](C)C)C(=O)[O-])[C@@H](NC(=O)[C@@H](NC(=O)[C@@H]([NH3+])[C@H](CC)C)C(C)C)C | COOH | NH2 | Yes | -0.89 | 7.0 | 3 |  |

|     |       |                                                                                                                    |       |         |     |       |     |   |
|-----|-------|--------------------------------------------------------------------------------------------------------------------|-------|---------|-----|-------|-----|---|
| 127 | FGAGI | O=C(N[C@H](C(=O)NCC(=O)N[C@@H]([C@H](C)C)C(=O)[O-])C)CNC(=O)[C@@H]([NH3+])Cc1ccccc1                                | COOH  | NH2     | Yes | -1.87 | 7.0 | 3 |
| 128 | FAAAL | O=C(N[C@@H](CC(C)C)C(=O)[O-])[C@@H](NC(=O)[C@@H](NC(=O)[C@@H](NC(=O)[C@@H]([NH3+])Cc1ccccc1)C)C)C                  | COOH  | NH2     | Yes | -2.23 | 7.0 | 3 |
| 129 | WGGFV | O=C(NCC(=O)N[C@@H](Cc1ccccc1)C(=O)N[C@@H](C(C)C)C(=O)[O-])CNC(=O)[C@@H]([NH3+])Cc1c2c([nH]c1)cccc2                 | COOH  | NH2     | Yes | -0.44 | 7.0 | 3 |
| 130 | WLFAA | O=C(N[C@H](C(=O)N[C@H](C(=O)[O-])C)C)[C@@H](NC(=O)[C@@H](NC(=O)[C@@H]([NH3+])Cc1c2c([nH]c1)cccc2)CC(C)C)Cc1ccccc1  | COOH  | NH2     | Yes | -0.32 | 7.0 | 3 |
| 131 | IAYWG | Oc1ccc(cc1)C[C@H](NC(=O)[C@@H](NC(=O)[C@@H]([NH3+])[C@H](CC(C)C)C(=O)N[C@@H](Cc1c2c([nH]c1)cccc2)C(=O)NCC(=O)[O-]) | COOH  | NH2     | Yes | -1.47 | 7.0 | 3 |
| 132 | GLSVL | OC[C@H](NC(=O)[C@@H](NC(=O)C[NH3+])CC(C)C(=O)N[C@@H](C(C)C)C(=O)N[C@@H](CC(C)C)C(=O)[O-]                           | COOH  | NH2     | Yes | -1.64 | 7.0 | 3 |
| 133 | SLAIV | OC[C@H]([NH3+])C(=O)N[C@@H](CC(C)C)C(=O)N[C@H](C(=O)N[C@@H]([C@H](CC(C)C)C(=O)N[C@@H](C(C)C)C(=O)[O-])C            | COOH  | NH2     | Yes | -1.94 | 7.0 | 3 |
| 134 | YTGFL | Oc1ccc(cc1)C[C@H]([NH3+])C(=O)N[C@@H]([C@H](O)C)C(=O)NCC(=O)N[C@@H](Cc1ccccc1)C(=O)N[C@@H](CC(C)C)C(=O)[O-]        | COOH  | NH2     | Yes | -1.18 | 7.0 | 3 |
| 135 | LVGTF | O=C(N[C@@H]([C@H](O)C)C(=O)N[C@@H](Cc1ccccc1)C(=O)[O-])CNC(=O)[C@@H](NC(=O)[C@@H]([NH3+])CC(C)C)C                  | COOH  | NH2     | Yes | -1.18 | 7.0 | 3 |
| 136 | YGGFL | Oc1ccc(cc1)C[C@H]([NH3+])C(=O)NCC(=O)NCC(=O)N[C@@H](Cc1ccccc1)C(=O)N[C@@H](CC(C)C)C(=O)[O-]                        | COOH  | NH2     | Yes | -0.80 | 7.0 | 3 |
| 137 | YGGFM | S(CC[C@H](NC(=O)[C@@H](NC(=O)CNC(=O)CN)C(=O)[C@@H]([NH3+])Cc1ccc(O)cc1)Cc1ccccc1)C(=O)[O-]C                        | COOH  | NH2     | Yes | -1.39 | 7.0 | 3 |
| 138 | FF    | O=C(N[C@@H](Cc1ccccc1)C(=O)[O-])[C@@H]([NH3+])Cc1ccccc1                                                            | COOH  | NH2     | Yes | -0.94 | 7.4 | 4 |
| 139 | WW    | O=C(N[C@@H](Cc1c2c([nH]c1)cccc2)C(=O)[O-])[C@@H]([NH3+])Cc1c2c([nH]c1)cccc2                                        | COOH  | NH2     | Yes | -0.35 | 7.4 | 4 |
| 140 | WWW   | O=C(N[C@@H](Cc1c2c([nH]c1)cccc2)C(=O)[O-])[C@@H](NC(=O)[C@@H]([NH3+])Cc1c2c([nH]c1)cccc2)Cc1c2c([nH]c1)cccc2       | COOH  | NH2     | Yes | 0.51  | 7.4 | 4 |
| 141 | WMDF  | S(CC[C@H](NC(=O)[C@@H]([NH3+])Cc1c2c([nH]c1)cccc2)C(=O)N[C@@H](CC(=O)[O-])C(=O)N[C@@H](Cc1ccccc1)C(=O)N)C          | COOH  | NH3     | Yes | 1.60  | 7.4 | 5 |
| 142 | WMRF  | S(CC[C@H](NC(=O)[C@@H]([NH3+])Cc1c2c([nH]c1)cccc2)C(=O)N[C@@H](CCCNC(=NH2+))N)C(=O)N[C@@H](Cc1ccccc1)C(=O)N)C      | COOH  | NH4     | Yes | 1.90  | 7.4 | 5 |
| 143 | WDMF  | S(CC[C@H](NC(=O)[C@@H](NC(=O)[C@@H]([NH3+])Cc1c2c([nH]c1)cccc2)CC(=O)[O-])C(=O)N[C@@H](Cc1ccccc1)C(=O)N)C          | COOH  | NH5     | Yes | 1.70  | 7.4 | 5 |
| 144 | SQDG  | OC[C@H]([NH3+])C(=O)N[C@@H](CCC(=O)N)C(=O)N[C@@H](CC(=O)[O-])C(=O)NCC(=O)N                                         | COOH  | NH6     | Yes | -2.40 | 7.4 | 5 |
| 145 | SQRG  | OC[C@H]([NH3+])C(=O)N[C@@H](CCC(=O)N)C(=O)N[C@@H](CCCNC(=NH2+))N)C(=O)NCC(=O)N                                     | COOH  | NH7     | Yes | -2.40 | 7.4 | 5 |
| 146 | GV    | [H]N(C(C)=O)CC(N[C@@H](C(C)C)C(N)=O)=O                                                                             | CONH2 | NHCOCH3 | No  | -1.33 | 7.0 |   |
| 147 | AV    | [H]N(C(C)=O)[C@H](C(N[C@@H](C(C)C)C(N)=O)=O)C                                                                      | CONH2 | NHCOCH3 | No  | -1.13 | 7.0 | 6 |
| 148 | LV    | [H]N(C(C)=O)[C@@H](CC(C)C)C(N[C@@H](C(C)C)C(N)=O)=O                                                                | CONH2 | NHCOCH3 | No  | 0.26  | 7.0 | 6 |
| 149 | GF    | [H]N(C(C)=O)CC(N[C@H](C(N)=O)CC1=CC=CC=C1)=O                                                                       | CONH2 | NHCOCH3 | No  | -0.56 | 7.0 | 6 |
| 150 | IV    | [H]N(C(C)=O)[C@]([H])(C(N[C@H](C(N)=O)C(C)C)=O)[C@@H](C)CC                                                         | CONH2 | NHCOCH3 | No  | 0.16  | 7.0 | 6 |
| 151 | VV    | [H]N(C(C)=O)[C@@H](C(C)C)C(N[C@@H](C(C)C                                                                           | CONH2 | NHCOCH3 | No  | -0.32 | 7.0 | 6 |

|     |      |                                                                      |       |         |     |       |     |   |  |
|-----|------|----------------------------------------------------------------------|-------|---------|-----|-------|-----|---|--|
|     |      | )C(N)=O)=O                                                           |       |         |     |       |     |   |  |
| 152 | FV   | [H]N(C(C)=O)[C@H](C(N[C@@H](C(C)C)C(N)=O)=O)CC1=CC=CC=C1             | CONH2 | NHCOCH3 | No  | 0.43  | 7.0 | 6 |  |
| 153 | AL   | [H]N(C(C)=O)[C@H](C(N[C@@H](CC(C)C)C(N)=O)=O)C                       | CONH2 | NHCOCH3 | No  | -0.54 | 7.0 | 6 |  |
| 154 | AA   | [H]N(C(C)=O)[C@H](C(N[C@H](C(N)=O)C)=O)C                             | CONH2 | NHCOCH3 | No  | -2.01 | 7.0 | 6 |  |
| 155 | GL   | [H]N(C(C)=O)CC(N[C@@H](CC(C)C)C(N)=O)=O                              | CONH2 | NHCOCH3 | No  | -0.78 | 7.0 | 6 |  |
| 156 | LI   | [H]N(C(C)=O)[C@H](CC(C)C)C(N[C@H]([C@@H](C)CC)([H])C(N)=O)=O         | CONH2 | NHCOCH3 | No  | 0.68  | 7.0 | 6 |  |
| 157 | FG   | [H]N(C(C)=O)[C@H](C(NCC(N)=O)=O)CC1=CC=C1                            | CONH2 | NHCOCH3 | No  | -0.5  | 7.0 | 6 |  |
| 158 | VA   | [H]N(C(C)=O)[C@H](C(C)C)C(N[C@H](C(N)=O)C)=O                         | CONH2 | NHCOCH3 | No  | -1.14 | 7.0 | 6 |  |
| 159 | YV   | [H]N(C(C)=O)[C@H](C(N[C@@H](C(C)C)C(N)=O)=O)CC1=CC=C(O)C=C1          | CONH2 | NHCOCH3 | No  | -0.2  | 7.0 | 6 |  |
| 160 | YL   | [H]N(C(C)=O)[C@H](C(N[C@@H](CC(C)C)C(N)=O)=O)CC1=CC=C(O)C=C1         | CONH2 | NHCOCH3 | No  | 0.32  | 7.0 | 6 |  |
| 161 | YF   | [H]N(C(C)=O)[C@H](C(N[C@H](C(N)=O)CC1=CC=CC=C1)=O)CC2=CC=C(O)C=C2    | CONH2 | NHCOCH3 | No  | 0.54  | 7.0 | 6 |  |
| 162 | WV   | [H]N(C(C)=O)[C@H](C(N[C@@H](C(C)C)C(N)=O)=O)CC1=CC=CC=C1             | CONH2 | NHCOCH3 | No  | 0.73  | 7.0 | 6 |  |
| 163 | MV   | [H]N(C(C)=O)[C@H](C(N[C@@H](C(C)C)C(N)=O)=O)CCSC                     | CONH2 | NHCOCH3 | No  | -0.28 | 7.0 | 6 |  |
| 164 | MF   | [H]N(C(C)=O)[C@H](C(N[C@H](C(N)=O)CC1=CC=CC=C1)=O)CCSC               | CONH2 | NHCOCH3 | No  | 0.42  | 7.0 | 6 |  |
| 165 | SV   | [H]N(C(C)=O)[C@H](CO)C(N[C@@H](C(C)C)C(N)=O)=O                       | CONH2 | NHCOCH3 | No  | -1.53 | 7.0 | 6 |  |
| 166 | SF   | [H]N(C(C)=O)[C@H](CO)C(N[C@H](C(N)=O)C1=CC=CC=C1)=O                  | CONH2 | NHCOCH3 | No  | -0.79 | 7.0 | 6 |  |
| 167 | TV   | [H]N(C(C)=O)[C@H]([C@@H](C)O)([H])C(N[C@@H](C(C)C)C(N)=O)=O          | CONH2 | NHCOCH3 | No  | -1.25 | 7.0 | 6 |  |
| 168 | TI   | [H]N(C(C)=O)[C@H]([C@@H](C)O)([H])C(N[C@@H](C@H)(C)CC)([H])C(N)=O)=O | CONH2 | NHCOCH3 | No  | -0.86 | 7.0 | 6 |  |
| 169 | NV   | [H]N(C(C)=O)[C@H](CC(N)=O)C(N[C@@H](C(C)C)C(N)=O)=O                  | CONH2 | NHCOCH3 | No  | -1.85 | 7.0 | 6 |  |
| 170 | NI   | [H]N(C(C)=O)[C@H](CC(N)=O)C(N[C@H]([C@@H](C)CC)([H])C(N)=O)=O        | CONH2 | NHCOCH3 | No  | -1.43 | 7.0 | 6 |  |
| 171 | NF   | [H]N(C(C)=O)[C@H](CC(N)=O)C(N[C@H](C(N)=O)CC1=CC=CC=C1)=O            | CONH2 | NHCOCH3 | No  | -1.14 | 7.0 | 6 |  |
| 172 | LN   | [H]N(C(C)=O)[C@H](CC(C)C)C(N[C@@H](CC(N)=O)C(N)=O)=O                 | CONH2 | NHCOCH3 | No  | -1.3  | 7.0 | 6 |  |
| 173 | IN   | [H]N(C(C)=O)[C@H]([C@H](CC)C)([H])C(N[C@@H](CC(N)=O)C(N)=O)=O        | CONH2 | NHCOCH3 | No  | -1.41 | 7.0 | 6 |  |
| 174 | QV   | [H]N(C(C)=O)[C@H](CCC(N)=O)C(N[C@@H](C(C)C)C(N)=O)=O                 | CONH2 | NHCOCH3 | No  | -1.85 | 7.0 | 6 |  |
| 175 | QL   | [H]N(C(C)=O)[C@H](CCC(N)=O)C(N[C@@H](C(C)C)C(N)=O)=O                 | CONH2 | NHCOCH3 | No  | -1.32 | 7.0 | 6 |  |
| 176 | QF   | [H]N(C(C)=O)[C@H](CCC(N)=O)C(N[C@H](C(N)=O)CC1=CC=CC=C1)=O           | CONH2 | NHCOCH3 | No  | -1.14 | 7.0 | 6 |  |
| 177 | FQ   | [H]N(C(C)=O)[C@H](C(N[C@@H](CCC(N)=O)C(N)=O)=O)CC1=CC=CC=C1          | CONH2 | NHCOCH3 | No  | -1.03 | 7.0 | 6 |  |
| 178 | VQ   | [H]N(C(C)=O)[C@H](C(C)C)C(N[C@@H](CCC(N)=O)C(N)=O)=O                 | CONH2 | NHCOCH3 | No  | -1.82 | 7.0 | 6 |  |
| 179 | KF   | O=C(N[C@@H](CCCC[NH3+])C(=O)N[C@@H](Cc1cccc1)C(=O)N)C                | CONH2 | NHCOCH3 | Yes | -2.43 | 7.0 | 6 |  |
| 180 | FK   | O=C(N[C@@H](Cc1cccc1)C(=O)N[C@@H](CCC[NH3+])C(=O)N)C                 | CONH2 | NHCOCH3 | Yes | -2.23 | 7.0 | 6 |  |
| 181 | OrnF | O=C(N[C@@H](CCC[NH3+])C(=O)N[C@@H](Cc1cccc1)C(=O)N)C                 | CONH2 | NHCOCH3 | Yes | -2.23 | 7.0 | 6 |  |
| 182 | VAA  | [H]N(C(C)=O)[C@H](C(C)C)C(N[C@H](C(N[C@H](C(N)=O)C)=O)C)=O           | CONH2 | NHCOCH3 | No  | -1.4  | 7.0 | 6 |  |
| 183 | VAV  | [H]N(C(C)=O)[C@H](C(C)C)C(N[C@H](C(N[C@H](C(C)C)C(N)=O)C)=O)C)=O     | CONH2 | NHCOCH3 | No  | -0.67 | 7.0 | 6 |  |
| 184 | VIG  | [H]N(C(C)=O)[C@H](C(C)C)C(N[C@H]([C@@H](C)CC)([H])C(NCC(N)=O)=O)=O   | CONH2 | NHCOCH3 | No  | -0.45 | 7.0 | 6 |  |

|     |       |                                                                                     |       |         |     |       |     |   |
|-----|-------|-------------------------------------------------------------------------------------|-------|---------|-----|-------|-----|---|
| 185 | ALV   | [H]N(C(C)=O)[C@H](C(N[C@@H](CC(C)C)C(N[C@@H](C(C)C)C(N)=O)=O)C                      | CONH2 | NHCOCH3 | No  | -0.14 | 7.0 | 6 |
| 186 | VFA   | [H]N(C(C)=O)[C@@H](C(C)C)C(N[C@H](C(N[C@H](C(N)=O)C)=O)CC1=CC=CC=C1)=O              | CONH2 | NHCOCH3 | No  | 0.06  | 7.0 | 6 |
| 187 | AVI   | [H]N(C(C)=O)[C@H](C(N[C@@H](C(C)C)C(N[C@@H]([C@@H](C)CC)([H])C(N)=O)=O)C            | CONH2 | NHCOCH3 | No  | -0.2  | 7.0 | 6 |
| 188 | IFA   | [H]N(C(C)=O)[C@]([C@H](CC)C)([H])C(N[C@H](C(N[C@H](C(N)=O)C)=O)CC1=CC=CC=C1)=O      | CONH2 | NHCOCH3 | No  | 0.52  | 7.0 | 6 |
| 189 | GAV   | [H]N(C(C)=O)CC(N[C@H](C(N[C@@H](C(C)C)C(N)=O)C)=O)C                                 | CONH2 | NHCOCH3 | No  | -1.56 | 7.0 | 6 |
| 190 | AGF   | [H]N(C(C)=O)[C@H](C(NCC(N[C@H](C(N)=O)CC1=CC=CC=C1)=O)C                             | CONH2 | NHCOCH3 | No  | -0.71 | 7.0 | 6 |
| 191 | IAV   | [H]N(C(C)=O)[C@]([C@H](CC)C)([H])C(N[C@H](C(N[C@@H](C(C)C)C(N)=O)C)=O               | CONH2 | NHCOCH3 | No  | -0.21 | 7.0 | 6 |
| 192 | FGL   | [H]N(C(C)=O)[C@H](C(NCC(N[C@@H](CC(C)C)C(N)=O)=O)CC1=CC=CC=C1                       | CONH2 | NHCOCH3 | No  | 0.6   | 7.0 | 6 |
| 193 | FIG   | [H]N(C(C)=O)[C@H](C(N[C@@H]([C@@H](C)CC)([H])C(NCC(N)=O)=O)CC1=CC=CC=C1             | CONH2 | NHCOCH3 | No  | 0.34  | 7.0 | 6 |
| 194 | VVI   | [H]N(C(C)=O)[C@@H](C(C)C)C(N[C@H](C(C)C)C(N[C@@H]([C@@H](C)CC)([H])C(N)=O)=O        | CONH2 | NHCOCH3 | No  | 0.49  | 7.0 | 6 |
| 195 | GLG   | [H]N(C(C)=O)CC(N[C@@H](CC(C)C)C(NCC(N)=O)C)=O                                       | CONH2 | NHCOCH3 | No  | -1.23 | 7.0 | 6 |
| 196 | AYL   | [H]N(C(C)=O)[C@H](C(N[C@H](C(N[C@@H](CC(C)C)C(N)=O)CC(C=C1)=CC=C1O)=O)C             | CONH2 | NHCOCH3 | No  | -0.04 | 7.0 | 6 |
| 197 | AYF   | [H]N(C(C)=O)[C@H](C(N[C@H](C(N[C@H](C(N)=O)CC1=CC=CC=C1)=O)CC(C=C2)=CC=C2O)=O)C     | CONH2 | NHCOCH3 | No  | 0.26  | 7.0 | 6 |
| 198 | WAA   | [H]N(C(C)=O)[C@H](C(N[C@H](C(N[C@H](C(N)=O)C)=O)C)=O)CC1=CNC2=C1C=CC=C2             | CONH2 | NHCOCH3 | No  | -0.38 | 7.0 | 6 |
| 199 | WIG   | [H]N(C(C)=O)[C@H](C(N[C@@H]([C@@H](C)CC)([H])C(NCC(N)=O)=O)CC1=CNC2=C1C=CC=C2       | CONH2 | NHCOCH3 | No  | 0.62  | 7.0 | 6 |
| 200 | WGF   | [H]N(C(C)=O)[C@H](C(NCC(N[C@H](C(N)=O)CC1=CC=CC=C1)=O)CC2=CNC3=C2C=CC=C3            | CONH2 | NHCOCH3 | No  | 0.99  | 7.0 | 6 |
| 201 | WAV   | [H]N(C(C)=O)[C@H](C(N[C@H](C(N[C@@H](C(C)C)C(N)=O)C)=O)CC1=CNC2=C1C=CC=C2           | CONH2 | NHCOCH3 | No  | 0.36  | 7.0 | 6 |
| 202 | AMV   | [H]N(C(C)=O)[C@H](C(N[C@H](C(N[C@@H](C(C)C)C(N)=O)CCSC)=O)C                         | CONH2 | NHCOCH3 | No  | -0.63 | 7.0 | 6 |
| 203 | IMF   | [H]N(C(C)=O)[C@]([C@H](CC)C)([H])C(N[C@H](C(N[C@H](C(N)=O)CC1=CC=CC=C1)=O)CCSC)=O   | CONH2 | NHCOCH3 | No  | 1.28  | 7.0 | 6 |
| 204 | LSF   | [H]N(C(C)=O)[C@@H](CC(C)C)C(N[C@H](CO)C(N[C@H](C(N)=O)CC1=CC=CC=C1)=O)C             | CONH2 | NHCOCH3 | No  | 0.23  | 7.0 | 6 |
| 205 | LTL   | [H]N(C(C)=O)[C@@H](CC(C)C)C(N[C@@H]([C@H](O)C)([H])C(N[C@@H](CC(C)C)C(N)=O)=O)C     | CONH2 | NHCOCH3 | No  | 0.24  | 7.0 | 6 |
| 206 | KFV   | O=C(N[C@@H](CCCC[NH3+])C(=O)N[C@@H](Cc1ccccc1)C(=O)N[C@@H](C(C)C)C(=O)N)C           | CONH2 | NHCOCH3 | Yes | -2.13 | 7.0 | 6 |
| 207 | KIF   | O=C(N[C@@H](CCCC[NH3+])C(=O)N[C@@H]([C@H](CC)C)C(=O)N[C@@H](Cc1ccccc1)C(=O)N)C      | CONH2 | NHCOCH3 | Yes | -1.46 | 7.0 | 6 |
| 208 | KFL   | O=C(N[C@@H](CCCC[NH3+])C(=O)N[C@@H](Cc1ccccc1)C(=O)N[C@@H](CC(C)C)C(=O)N)C          | CONH2 | NHCOCH3 | Yes | -1.51 | 7.0 | 6 |
| 209 | LKF   | O=C(N[C@@H](CC(C)C)C(=O)N[C@@H](CCCC[NH3+])C(=O)N[C@@H](Cc1ccccc1)C(=O)N)C          | CONH2 | NHCOCH3 | Yes | -1.41 | 7.0 | 6 |
| 210 | OrnFL | O=C(N[C@@H](CCC[NH3+])C(=O)N[C@@H](Cc1ccccc1)C(=O)N[C@@H](CC(C)C)C(=O)N)C           | CONH2 | NHCOCH3 | Yes | -1.37 | 7.0 | 6 |
| 211 | LOrnF | O=C(N[C@@H](CC(C)C)C(=O)N[C@@H](CCC[NH3+])C(=O)N[C@@H](Cc1ccccc1)C(=O)N)C           | CONH2 | NHCOCH3 | Yes | -1.38 | 7.0 | 6 |
| 212 | RIF   | O=C(N[C@@H](CCCNC(=[NH2+])N)C(=O)N[C@@H]([C@H](CC)C)C(=O)N[C@@H](Cc1ccccc1)C(=O)N)C | CONH2 | NHCOCH3 | Yes | -0.90 | 7.0 | 6 |
| 213 | RFL   | O=C(N[C@@H](CCCNC(=[NH2+])N)C(=O)N[C@@H](Cc1ccccc1)C(=O)N[C@@H](CC(C)C)C(=O)N)C     | CONH2 | NHCOCH3 | Yes | -1.04 | 7.0 | 6 |
| 214 | LRF   | O=C(N[C@@H](CC(C)C)C(=O)N[C@@H](CCCNC(=[NH2+])N)C(=O)N[C@@H](Cc1ccccc1)C(=O)N)C     | CONH2 | NHCOCH3 | Yes | -0.76 | 7.0 | 6 |
| 215 | LFR   | O=C(N[C@@H](CC(C)C)C(=O)N[C@@H](Cc1ccccc1)C(=O)N[C@@H](CCCNC(=[NH2+])N)C(=O)N)C     | CONH2 | NHCOCH3 | Yes | -0.93 | 7.0 | 6 |

|     |                 |                                                                                                                                   |       |         |     |       |     |   |
|-----|-----------------|-----------------------------------------------------------------------------------------------------------------------------------|-------|---------|-----|-------|-----|---|
| 216 | IFR             | O=C(N[C@@H]([C@H](CC)C)C(=O)N[C@@H](Cc1cccc1)C(=O)N[C@@H](CCNC(=[NH2+])N)C(=O)N)C                                                 | CONH2 | NHCOCH3 | Yes | -0.93 | 7.0 | 6 |
| 217 | HIF             | O=C(N[C@@H](Cc1[nH]cnc1)C(=O)N[C@@H]([C@H](CC)C)C(=O)N[C@@H](Cc1cccc1)C(=O)N)C                                                    | CONH2 | NHCOCH3 | Yes | 0.36  | 7.0 | 6 |
| 218 | FHL             | O=C(N[C@@H](Cc1cccc1)C(=O)N[C@@H](Cc1[nH]cnc1)C(=O)N[C@@H](CC(C)C)C(=O)N)C                                                        | CONH2 | NHCOCH3 | Yes | 0.46  | 7.0 | 6 |
| 219 | IHV             | O=C(N[C@@H]([C@H](CC)C)C(=O)N[C@@H](Cc1[nH]cnc1)C(=O)N[C@@H](C(C)C)C(=O)N)C                                                       | CONH2 | NHCOCH3 | Yes | -0.33 | 7.0 | 6 |
| 220 | GFH             | O=C(N[C@@H](Cc1cccc1)C(=O)N[C@@H](Cc1[nH]cnc1)C(=O)N)CNC(=O)C                                                                     | CONH2 | NHCOCH3 | Yes | -1.09 | 7.0 | 6 |
| 221 | WHV             | O=C(N[C@@H](Cc1[nH]cnc1)C(=O)N[C@@H](C(C)C)C(=O)N)[C@@H](NC(C)=C)C1c2c([nH]c1)ccc2                                                | CONH2 | NHCOCH3 | Yes | 0.16  | 7.0 | 6 |
| 222 | FWH             | O=C(N[C@@H](Cc1cccc1)C(=O)N[C@@H](Cc1c2c([nH]c1)cccc2)C(=O)N[C@@H](Cc1[nH]cnc1)C(=O)N)C                                           | CONH2 | NHCOCH3 | Yes | 0.89  | 7.0 | 6 |
| 223 | DFL             | O=C(N[C@@H](CC(=O)[O-])C(=O)N[C@@H](Cc1cccc1)C(=O)N[C@@H](C(C)C)C(=O)N)C                                                          | CONH2 | NHCOCH3 | Yes | -1.39 | 7.0 | 6 |
| 224 | FDL             | O=C(N[C@@H](Cc1cccc1)C(=O)N[C@@H](CC(=O)[O-])C(=O)N[C@@H](CC(C)C)C(=O)N)C                                                         | CONH2 | NHCOCH3 | Yes | -1.19 | 7.0 | 6 |
| 225 | LDL             | O=C(N[C@@H](CC(C)C)C(=O)N[C@@H](CC(=O)[O-])C(=O)N[C@@H](CC(C)C)C(=O)N)C                                                           | CONH2 | NHCOCH3 | Yes | -1.55 | 7.0 | 6 |
| 226 | ILD             | O=C(N[C@@H]([C@H](CC)C)C(=O)N[C@@H](CC(C)C)C(=O)N[C@@H](CC(=O)[O-])C(=O)N)C                                                       | CONH2 | NHCOCH3 | Yes | -1.90 | 7.0 | 6 |
| 227 | EFL             | O=C(N[C@@H](CCC(=O)[O-])C(=O)N[C@@H](Cc1cccc1)C(=O)N[C@@H](C(C)C)C(=O)N)C                                                         | CONH2 | NHCOCH3 | Yes | -1.52 | 7.0 | 6 |
| 228 | EIF             | O=C(N[C@@H](CCC(=O)[O-])C(=O)N[C@@H]([C@H](CC)C)C(=O)N[C@@H](Cc1cccc1)C(=O)N)C                                                    | CONH2 | NHCOCH3 | Yes | -1.57 | 7.0 | 6 |
| 229 | FEF             | O=C(N[C@@H](Cc1cccc1)C(=O)N[C@@H](CCC(=O)[O-])C(=O)N[C@@H](Cc1cccc1)C(=O)N)C                                                      | CONH2 | NHCOCH3 | Yes | -1.08 | 7.0 | 6 |
| 230 | LEF             | O=C(N[C@@H](CC(C)C)C(=O)N[C@@H](CCC(=O)[O-])C(=O)N[C@@H](Cc1cccc1)C(=O)N)C                                                        | CONH2 | NHCOCH3 | Yes | -1.25 | 7.0 | 6 |
| 231 | LIE             | O=C(N[C@@H](CC(C)C)C(=O)N[C@@H]([C@H](CC)C)C(=O)N[C@@H](CCC(=O)[O-])C(=O)N)C                                                      | CONH2 | NHCOCH3 | Yes | -1.87 | 7.0 | 6 |
| 232 | (D-)F(D-)F(D-)F | [H]N(C(C)=O)[C@@H](C(N[C@@H](C(N)=O)CC1=CC=CC=C1)=O)CC2=CC=CC=C2)=O)CC3=CC=CC=C3                                                  | CONH2 | NHCOCH3 | No  | 2.3   | 7.2 | 7 |
| 233 | YPWF            | Oc1ccc(cc1)C[C@H]([NH3+])C(=O)N1CCC[C@H]1C(=O)N[C@@H](Cc1c2c([nH]c1)cccc2)C(=O)N[C@@H](Cc1cccc1)C(=O)N                            | CONH2 | NH2     | Yes | 1.10  | 7.4 | 8 |
| 234 | Y(D-)AWF        | Oc1ccc(cc1)C[C@H]([NH3+])C(=O)N[C@@H](C(=O)N[C@@H](Cc1c2c([nH]c1)cccc2)C(=O)N[C@@H](Cc1cccc1)C(=O)[O-])C                          | CONH2 | NH2     | Yes | 1.29  | 7.4 | 8 |
| 235 | YPIDV           | Oc1ccc(cc1)C[C@H](NC(=O)C)C(=O)N1CCC[C@H]1C(=O)N[C@@H]([C@H](CC)C)C(=O)N[C@@H](CC(=O)[O-])C(=O)N[C@@H](C(C)C)C(=O)N               | CONH2 | NHCOCH3 | Yes | -1.85 | 7.2 | 9 |
| 236 | YPINV           | NC([C@H](C(C)C)NC([C@H](CC(N)=O)NC([C@@]([C@@H](C)CC)([H])NC([C@@H]1CCCN1C([C@@H](NC(C)=O)CC2=CC=C(O)C=C2)=O)=O)=O)=O)=O          | CONH2 | NHCOCH3 | No  | -0.42 | 7.2 | 9 |
| 237 | YPGNV           | NC([C@H](C(C)C)NC([C@H](CC(N)=O)NC(CNC([C@@H]1CCCN1C([C@@H](NC(C)=O)CC2=CC=C(O)C=C2)=O)=O)=O)=O)=O                                | CONH2 | NHCOCH3 | No  | -2.06 | 7.2 | 9 |
| 238 | YPIIV           | NC([C@H](C(C)C)NC([C@@]([C@@H](C)CC)([H])NC([C@@]([C@@H](C)CC)([H])NC([C@@H]1CCCN1C([C@@H](NC(C)=O)CC2=CC=C(O)C=C2)=O)=O)=O)=O)=O | CONH2 | NHCOCH3 | No  | 1.13  | 7.2 | 9 |
| 239 | YPGIV           | NC([C@H](C(C)C)NC([C@@]([C@@H](C)CC)([H])NC(CNC([C@@H]1CCCN1C([C@@H](NC(C)=O)CC2=CC=C(O)C=C2)=O)=O)=O)=O)=O                       | CONH2 | NHCOCH3 | No  | -0.2  | 7.2 | 9 |
| 240 | FPIIV           | [H]N(C(C)=O)[C@H](C(N1CCC[C@H]1C(N[C@@]([C@@H](C)CC)([H])C(N[C@@]([C@@H](C)CC)([H])C(N[C@@H](C(C)C)C(N)=O)=O)=O)=O)CC2=           | CONH2 | NHCOCH3 | No  | 1.61  | 7.2 | 9 |

|                     |        |                                                                                                                                                      |       |         |     |       |     |    |  |
|---------------------|--------|------------------------------------------------------------------------------------------------------------------------------------------------------|-------|---------|-----|-------|-----|----|--|
|                     |        | CC=CC=C2                                                                                                                                             |       |         |     |       |     |    |  |
| 241                 | FPGIV  | [H]N(C(C)=O)[C@H](C(N1CCC[C@H]1C(NCC(N[C@@]([C@@H](C)CC)([H])C(N[C@@H](C(C)C)C(N)=O)=O)=O)=O)CC2=CC=CC=C2                                            | CONH2 | NHCOCH3 | No  | 1.96  | 7.2 | 9  |  |
| 242                 | FPII   | [H]N(C(C)=O)[C@H](C(N1CCC[C@H]1C(N[C@@]([C@@H](C)CC)([H])C(N[C@@H](C(C)C)CC)([H])C(N)=O)=O)=O)CC2=CC=CC=C2                                           | CONH2 | NHCOCH3 | No  | 1.17  | 7.2 | 9  |  |
| 243                 | FPGI   | [H]N(C(C)=O)[C@H](C(N1CCC[C@H]1C(NCC(N[C@@]([C@@H](C)CC)([H])C(N)=O)=O)=O)CC2=CC=CC=C2                                                               | CONH2 | NHCOCH3 | No  | 2     | 7.2 | 9  |  |
| <b>In-House Set</b> |        |                                                                                                                                                      |       |         |     |       |     |    |  |
| 1                   | GPG    | O=C(NCC(=O)N)[C@H]1N(CCC1)C(=O)C[NH3+]                                                                                                               | CONH2 | NH2     | Yes | -3.05 | 7.4 | 10 |  |
| 2                   | YPWF   | Oc1ccc(cc1)C[C@H]([NH3+])C(=O)N1CCC[C@H]1C(=O)N[C@@H](Cc1c2c([nH]c1)cccc2)C(=O)N[C@@H](Cc1cccc1)C(=O)N                                               | CONH2 | NH2     | Yes | 1.29  | 7.4 | 10 |  |
| 3                   | QWL    | NC([C@H](CC(C)C)NC([C@@H](NC([C@H](CCC(N)=O)N(C(C)=O)[H])=O)CC1=CNC2=C1C=CC=C2)=O)=O                                                                 | CONH2 | NHCOCH3 | No  | 0.07  | 7.4 | 10 |  |
| 4                   | FLGKVV | O=C(N[C@@H](CCCC[NH3+])C(=O)N[C@@H](C(C)C)C(=O)N[C@@H](Cc1c2c([nH]c1)cccc2)C(=O)N)CNC(=O)[C@@H](NC(=O)[C@@H]([NH3+])Cc1cccc1)CC(C)C                  | CONH2 | NH2     | Yes | -0.99 | 7.4 | 10 |  |
| 5                   | KLWVAF | O=C(N[C@H](C(=O)N[C@@H](Cc1cccc1)C(=O)N)C)[C@@H](NC(=O)[C@@H](NC(=O)[C@@H](NC(=O)[C@@H]([NH3+])CCCC[NH3+])CC(C)C)C(C)C)Cc1c2c([nH]c1)cccc2           | CONH2 | NH2     | Yes | -1.13 | 7.4 | 10 |  |
| 6                   | LPVGFV | O=C(N[C@@H](C(C)C)C(=O)NCC(=O)N[C@@H](Cc1c2c([nH]c1)cccc2)C(=O)N[C@@H](Cc1cccc1)C(=O)N)[C@H]1N(CCC1)C(=O)[C@@H]([NH3+])CC(C)C                        | CONH2 | NH2     | Yes | 1.12  | 7.4 | 10 |  |
| 7                   | LYLGWI | Oc1ccc(cc1)C[C@H](NC(=O)[C@@H]([NH3+])CC(C)C)C(=O)N[C@@H](CC(C)C)C(=O)NCC(=O)N[C@@H](Cc1c2c([nH]c1)cccc2)C(=O)N[C@@H]([C@H](CC)C)C(=O)N              | CONH2 | NH2     | Yes | 2.16  | 7.4 | 10 |  |
| 8                   | PWGYVA | Oc1ccc(cc1)C[C@H](NC(=O)CNC(=O)[C@@H](NC(=O)[C@H]1[NH2+])CCC1)Cc1c2c([nH]c1)cccc2)C(=O)N[C@@H](C(C)C)C(=O)N[C@@H](C(=O)N)C                           | CONH2 | NH2     | Yes | -0.38 | 7.4 | 10 |  |
| 9                   | VPAFII | O=C(N[C@H](C(=O)N[C@@H](Cc1cccc1)C(=O)N[C@@H]([C@@H](CC(C)C)C(=O)N[C@@H](C(C)C)C(=O)N)C)[C@H]1N(CCC1)C(=O)[C@@H]([NH3+])C(C)C                        | CONH2 | NH2     | Yes | 0.66  | 7.4 | 10 |  |
| 10                  | ALIWGY | Oc1ccc(C[C@@H](C(N)=O)NC(CNC([C@H](Cc2c([nH]c3cccc23)NC([C@H]([C@@H](C)CC)NC([C@H](CC(C)C)NC([C@H](C)[NH3+])=O)=O)=O)=O)cc1                          | CONH2 | NH2     | Yes | 0.92  | 7.4 | 10 |  |
| 11                  | GAWPFL | O=C(N[C@@H](Cc1cccc1)C(=O)N[C@@H](CC(C)C)C(=O)N)[C@H]1N(CCC1)C(=O)[C@@H](NC(=O)[C@@H](NC(=O)C[NH3+])C)Cc1c2c([nH]c1)cccc2                            | CONH2 | NH2     | Yes | 0.80  | 7.4 | 10 |  |
| 12                  | VLIWV  | O=C(N[C@@H](Cc1cccc1)C(=O)N[C@@H](C(C)C)C(=O)N)[C@@H](NC(=O)[C@@H](NC(=O)[C@@H](NC(=O)[C@@H]([NH3+])C(C)C)CC(C)C)[C@H](CC)C)Cc1c2c([nH]c1)cccc2      | CONH2 | NH2     | Yes | 2.35  | 7.4 | 10 |  |
| 13                  | SVYLQP | Oc1ccc(cc1)C[C@H](NC(=O)[C@@H](NC(=O)[C@@H]([NH3+])CO)C(C)C)C(=O)N[C@@H](CC(C)C)C(=O)N[C@@H](CCC(=O)N)C(=O)N1CCC[C@H]1C(=O)N                         | CONH2 | NH2     | Yes | -1.59 | 7.4 | 10 |  |
| 14                  | IPFWKL | O=C(N[C@@H](Cc1cccc1)C(=O)N[C@@H](Cc1c2c([nH]c1)cccc2)C(=O)N[C@@H](CCCC[NH3+])C(=O)N[C@@H](CC(C)C)C(=O)N)[C@H]1N(CCC1)C(=O)[C@@H]([NH3+])C[C@H](CC)C | CONH2 | NH2     | Yes | -0.85 | 7.4 | 10 |  |
| 15                  | WPKIYV | Oc1ccc(cc1)C[C@H](NC(=O)[C@@H](NC(=O)[C@@H](NC(=O)[C@H]1N(CCC1)C(=O)[C@@H]([NH3+])Cc1c2c([nH]c1)cccc2)CCCC[NH3+])C[C@H](                             | CONH2 | NH2     | Yes | -1.82 | 7.4 | 10 |  |

|                   |                                                                                                                                                                                                                                                                                                                                                                                                         |  |  |  |  |  |  |
|-------------------|---------------------------------------------------------------------------------------------------------------------------------------------------------------------------------------------------------------------------------------------------------------------------------------------------------------------------------------------------------------------------------------------------------|--|--|--|--|--|--|
|                   | CC)C(=O)N[C@@H](C(C)C)C(=O)N                                                                                                                                                                                                                                                                                                                                                                            |  |  |  |  |  |  |
| <b>REFERENCES</b> |                                                                                                                                                                                                                                                                                                                                                                                                         |  |  |  |  |  |  |
| 1                 | Kim, A., & Szoka, F. C., Jr. (1992). Amino Acid Side-Chain Contributions to Free Energy of Transfer of Tripeptides from Water to Octanol. <i>Pharmaceutical Research</i> , 9(4), 504–514. <a href="http://doi.org/10.1023/A:1015892313856">http://doi.org/10.1023/A:1015892313856</a>                                                                                                                   |  |  |  |  |  |  |
| 2                 | Conradi, R. A., Hilgers, A. R., Ho, N., & Burton, P. S. (1991). The Influence of Peptide Structure on Transport Across Caco-2 Cells. <i>Pharmaceutical Research</i> , 8(12), 1453–1460. <a href="http://doi.org/10.1023/A:1015825912542">http://doi.org/10.1023/A:1015825912542</a>                                                                                                                     |  |  |  |  |  |  |
| 3                 | Akamatsu, M., & Fujita, T. (1992). Quantitative analyses of hydrophobicity of di- to pentapeptides having un-ionizable side chains with substituent and structural parameters. <i>Journal of Pharmaceutical Sciences</i> , 81(2), 164–174. <a href="http://doi.org/10.1002/jps.2600810213">http://doi.org/10.1002/jps.2600810213</a>                                                                    |  |  |  |  |  |  |
| 4                 | Gulyaeva, N., Zaslavsky, A., Lechner, P., Chait, A., & Zaslavsky, B. (2003). pH dependence of the relative hydrophobicity and lipophilicity of amino acids and peptides measured by aqueous two-phase and octanol-buffer partitioning. <i>Journal of Peptide Research</i> , 61(2), 71–79. <a href="http://doi.org/10.1034/j.1399-3011.2003.00037.x">http://doi.org/10.1034/j.1399-3011.2003.00037.x</a> |  |  |  |  |  |  |
| 5                 | Hunter, E. B., Powers, S. P., Kost, L. J., Pinon, D. I., Miller, L. J., & LaRusso, N. F. (1990). Physicochemical determinants in hepatic extraction of small peptides. <i>Hepatology</i> , 12(1), 76–82. <a href="http://doi.org/10.1002/hep.1840120113">http://doi.org/10.1002/hep.1840120113</a>                                                                                                      |  |  |  |  |  |  |
| 6                 | Akamatsu, M., Katayama, T., Kishimoto, D., Kurokawa, Y., Shibata, H., UENO, T., & Fujita, T. (1994). Quantitative analyses of the structure-hydrophobicity relationship for N- acetyl Di- and tripeptide amides. <i>Journal of Pharmaceutical Sciences</i> , 83(7), 1026–1033. <a href="http://doi.org/10.1002/jps.2600830720">http://doi.org/10.1002/jps.2600830720</a>                                |  |  |  |  |  |  |
| 7                 | Conradi, R. A., Hilgers, A. R., Ho, N. F. H., & Burton, P. S. (1992). The Influence of Peptide Structure on Transport Across Caco-2 Cells. II. Peptide Bond Modification Which Results in Improved Permeability. <i>Pharmaceutical Research</i> , 9(3), 435–439. <a href="http://doi.org/10.1023/A:1015867608405">http://doi.org/10.1023/A:1015867608405</a>                                            |  |  |  |  |  |  |
| 8                 | Liu, H. M., Liu, X. F., Yao, J. L., Wang, C. L., Yu, Y., & Wang, R. (2006). Utilization of combined chemical modifications to enhance the blood-brain barrier permeability and pharmacological activity of endomorphin-1. <i>Journal of Pharmacology and Experimental Therapeutics</i> , 319(1), 308–316. <a href="http://doi.org/10.1124/jpet.106.106484">http://doi.org/10.1124/jpet.106.106484</a>   |  |  |  |  |  |  |
| 9                 | Knipp, G. T., Vander Velde, D. G., Siahhaan, T. J., & Borchardt, R. T. (1997). The Effect of $\beta$ -Turn Structure on the Passive Diffusion of Peptides Across Caco-2 Cell Monolayers. <i>Pharmaceutical Research</i> , 14(10), 1332–1340. <a href="http://doi.org/10.1023/A:1012152117703">http://doi.org/10.1023/A:1012152117703</a>                                                                |  |  |  |  |  |  |
| 10                | This work                                                                                                                                                                                                                                                                                                                                                                                               |  |  |  |  |  |  |
